# Supplementary material for: A content analysis of the representation of statins in the British newsprint media
Source: PubMed Central journal article supplement — BMJ Open. 2017 Aug 21;7(8):e012613. doi: 10.1136/bmjopen-2016-012613 (PMC5724098; doi:10.1136/bmjopen-2016-012613), 2017-08-21
Supplement: bmjopen-2016-012613.draft_revisions.pdf [file bmjopen-2016-012613.draft_revisions.pdf]

# BMJ Open

## A CONTENT ANALYSIS OF THE REPRESENTATION OF STATINS IN THE BRITISH NEWSPRINT MEDIA

|                                 |                                                                                    |
|---------------------------------|------------------------------------------------------------------------------------|
| Journal:                        | <i>BMJ Open</i>                                                                    |
| Manuscript ID                   | bmjopen-2016-012613                                                                |
| Article Type:                   | Research                                                                           |
| Date Submitted by the Author:   | 13-May-2016                                                                        |
| Complete List of Authors:       | Chisnell, Julia; PenCLAHRC, Institute of Health Research                           |
| <b>Primary Subject Heading</b>: | Public health                                                                      |
| Secondary Subject Heading:      | Cardiovascular medicine                                                            |
| Keywords:                       | Statins, Content analysis, Cardiovascular medicine, Medicalisation, Media coverage |
|                                 |                                                                                    |

SCHOLARONE™  
Manuscripts

Peer Review Only

1  
2  
3  
4  
5  
6  
7  
8  
9  
10  
11  
12  
13  
14  
15  
16  
17  
18  
19  
20  
21  
22  
23  
24  
25  
26  
27  
28  
29  
30  
31  
32  
33  
34  
35  
36  
37  
38  
39  
40  
41  
42  
43  
44  
45  
46  
47  
48  
49  
50  
51  
52  
53  
54  
55  
56  
57  
58  
59  
60

# A CONTENT ANALYSIS OF THE REPRESENTATION OF STATINS IN THE BRITISH NEWSPRINT MEDIA

Author: Chisnell, J.

J M Chisnell  
Specialty Registrar in Public Health  
University of Exeter  
Email: [J.M.Chisnell@exeter.ac.uk](mailto:J.M.Chisnell@exeter.ac.uk)  
Tel: 07568-543585

Contact address:

PenCLAHRC, Institute of Health Research  
University of Exeter Medical School  
St Luke's Campus  
Exeter  
EX1 2LU

Keywords: Statins, cardiovascular medicine, content analysis, media coverage, medicalisation

Wordcount excluding title page, abstract, references and tables: 3039

Tables and graphs: 2 tables, 2 graphs

### What is already known

- \* The clinical and cost-effectiveness of statins in secondary and primary prevention is established in research and clinical guidance.
- \* There is continuing clinical debate around the extent & impact of the side-effects of statins and the optimum scale of their use in primary prevention.
- \* Studies have shown that the lay media can influence people's understanding of health issues and their health related behaviours. However the nature and extent of the debate concerning statins in the lay media is less well documented.

### What this study adds

- \* This study adds insight into the portrayal of preventative medications, and related clinical policy, in the media.
- \* It suggests there is scope for study authors, policy makers and public health practitioners to promote a more media-friendly, evidence-based narrative on health topics of public interest and concern.

## ABSTRACT

### *Objective*

This study reviewed the news media coverage of statins, seeking to identify specific trends or differences in viewpoint between media outlets and examine common themes.

### *Design*

The study is a media content analysis of the frequency and content of the reporting of statins in a selection of the British newsprint media. It involved an assessment of the number, timing and thematic content of articles followed by a discourse analysis examining the underlying narratives. The sample was the output of four UK newspapers, covering a broad spectrum readership, over six months 1 October 2013 - 31 March 2014.

### *Results*

A total of 67 articles included reference to statins. The majority (37, 55%) were reporting or responding to publication of a clinical study. The ratio of negative to positive coverage was greater than 2:1 overall. In the more politically right-leaning newspapers, 67% of coverage was predominantly negative (30/45 articles); 32% in the more left-leaning papers (7/22 articles). Common themes were:

- the perceived 'medicalisation' of the population;
- the balance between lifestyle modification and medical treatments in the primary prevention of heart disease;

- side effects and the effectiveness of statins;
- pharmaceutical sponsorship, and the implications for the reliability of evidence;
- trust between the public and government, institutions, research organisations and the medical profession.

### **Conclusions**

Newsprint media coverage of statins was substantially influenced by the publication of national guidance and by coverage in the medical journals of clinical studies and comment. Statins received a predominantly negative portrayal, notably in the more right-leaning press. There were shared themes: concern about the balance between medication and lifestyle change in the primary prevention of heart disease; the adverse effects of treatment; and a questioning of the reliability of evidence from research institutions, scientists and clinicians in the light of their potential allegiances and funding.

### **Strengths and limitations of this study**

- The use of media websites for data collection may have excluded some material which was only available in the print versions, and conversely included some material not available in print. It also led to some unavoidable exclusions, for example The Times and The Sun operate a subscription only service.

- 1  
2  
3  
4  
5  
6  
7  
8  
9  
10  
11  
12  
13  
14  
15  
16  
17  
18  
19  
20  
21  
22  
23  
24  
25  
26  
27  
28  
29  
30  
31  
32  
33  
34  
35  
36  
37  
38  
39  
40  
41  
42  
43  
44  
45  
46  
47  
48  
49  
50  
51  
52  
53  
54  
55  
56  
57  
58  
59  
60
- The pragmatic selection of the study timescale and media selection may have reduced the representativeness and therefore generalisability of the study. However, the sampling strategy was designed to ensure that the sources represented a reasonable range and diversity of the established newspaper media.
  - There was a single researcher and not a research team. This avoided inconsistency in analysis, but led to a risk of bias and potential incompleteness or errors in the identification and selection of articles and the analysis. Research questions and methods were clearly set out at the start and consistently followed, to ensure validity. Analysis by a second researcher of a sub-sample of the sources showed a high level of consistency.
  - Blinding was not strictly possible, but articles were coded by a unique numerical identifier to blind the researcher to source during the collection process to reduce bias during the thematic analysis. An inductive approach was applied to ensure that the themes were dictated by the evidence emerging from the texts and were not imposed by the researcher.

## INTRODUCTION

UK clinical guidelines recommend the use of lipid lowering therapy for both secondary and primary prevention.[1, 2] This is based on published clinical trial evidence of effectiveness, cost-effectiveness,[1, 3-8] and the extent of side-effects.[7-9] There is debate in the clinical literature about the merits of the widespread and growing use of statins.[10-16] The same issues are also covered in the lay media, where, however, the nature and extent of the debate is less well documented.

There is an identified interaction between the lay and clinical media[17-19] and, importantly, there is evidence that the lay media influences health-related perceptions and behaviours[20-25]. The Chief Medical Officer for England has called for a review into how the safety and efficacy of drugs is judged, prompted by concern about the representation of statins and other drugs “in both the medical and general press”. [26] A recent Dutch study, using national and regional media coverage as a proxy for individual exposure, found that negative statin-related news stories were associated with both early statin discontinuation and cardiovascular mortality.[27]

This study describes the nature of the representation of statins in the newsprint media, investigating the key themes, trends, characteristics and viewpoints.

## METHOD

A semi-quantitative descriptive and thematic analysis of the frequency of the coverage of statins in the UK newsprint media was undertaken. Media were selected with the aim of obtaining broad spectrum coverage reflecting a range of editorial leanings and readerships. An initial screening sample was undertaken in order to pilot the methodology and to consolidate the questions and sampling strategy for the main research.[28] This identified what would be practical for one researcher to collect, and enabled refinement of the range and type of outlets, the time period and the type of articles for inclusion in the main data collection. The sampling frame selected for the main study was the UK newsprint media. A purposive sampling strategy was followed, with newspapers selected on the basis that they were accessible, able to be searched and analysed by one researcher in the time available, and demographically, geographically and politically representative of a broad spectrum readership. The selected newspapers were The Daily Mail, The Daily Mirror, The Telegraph and The Guardian. These are all national UK newspapers, recording the highest circulation<sup>1</sup>.

---

<sup>1</sup> The Sun recorded the highest circulation but The Sun and The Times were excluded because they did not have free to access websites.



**Table 1 Readership of selected newspapers**

| Category                                  | Daily Mail                    | Daily Mirror | The Telegraph     | The Guardian |
|-------------------------------------------|-------------------------------|--------------|-------------------|--------------|
| Circulation                               | 1,863,000                     | 1,058,500    | 555,600           | 204,400      |
| Average age                               | 58                            | Not given    | 61                | 44           |
| Readership 65+                            | 45%                           | 34%          | 46%               | 21%          |
| Gender                                    | 51% female                    | 54% male     | 52% male          | 52% male     |
| Social class ABC1 <sup>2</sup>            | 64%                           | 43%          | 87%               | 89%          |
| Predominant geography [Mori 2005]         | 83% outside London & Scotland | North        | East & South East | London       |
| Predominant political stance <sup>3</sup> | Right                         | Left         | Centre right      | Centre left  |
| Market designation                        | Tabloid                       | Tabloid      | Broadsheet        | Broadsheet   |

Source: National Readership Survey 2014, UK Newspaper Guide 2014, TheMediaBriefing. Figures for 2013.

Full texts of articles were searched by keyword and collected retrospectively from the websites of the selected media outlets over a continuous six month timeframe (1 October 2013 to 31 March 2014). The main search term was “statin”. (“Statins” did not retrieve all mentions.) A further search on “cholesterol”, “cardiovascular” and “heart disease” was undertaken to confirm all relevant articles had been captured. All articles with any recorded mention of statins were screened. All types of article were included.

Articles were downloaded and printed in full. Each article was given a unique reference number, to blind the researcher to source during the analysis, and key descriptors were recorded. A thematic data analysis was then undertaken. A coding scheme provided a consistent framework for data collection and analysis

<sup>2</sup> Social gradings A-E are based on census data. ABC1 represents higher & intermediate to clerical and junior occupations.

<sup>3</sup> Political stance reflects party affiliation in the most recent general election.

1  
2 and enabled independent third party review. The exclusion criterion was  
3  
4 peripheral mention of statins with no associated reporting or comment.  
5  
6

7  
8  
9 The analysis was in two parts. A semi-quantitative analysis mapped the findings  
10  
11 against the descriptive indicators, including whether the coverage was judged to  
12  
13 be predominantly positive or negative in terms of the arguments, language, and  
14  
15 terminology. Where the proportion of positive and negative comments appeared  
16  
17 similar, or where it was difficult to decide on the overall direction, a neutral  
18  
19 assessment was given. A qualitative analysis then examined the discourses  
20  
21 within a selection of the key themes. A second qualitative researcher  
22  
23 independently analysed a small subset of sample articles against the descriptive  
24  
25 and thematic headings, to test the reliability of the data collection and thematic  
26  
27 selection. There was a high level of consistency between reviewers. Outlets  
28  
29 were then tracked back and identified in the results.  
30  
31  
32  
33  
34  
35

36 There were no confidentiality issues associated with the study as all data sources  
37  
38 were within the public domain. Ethics Committee approval was not required.  
39  
40  
41  
42  
43  
44  
45  
46  
47  
48  
49  
50  
51  
52  
53  
54  
55  
56  
57  
58  
59  
60

## RESULTS

Searches identified 67 articles (**Table 2**). In two thirds of articles, statins were the main topic. The majority of articles (37, 55%) were reporting or responding to publication of a clinical study.

**Table 2** Number, stance, and theme of articles mentioning statins  
1 October 2013 – 31 March 2014

|                                  |                                | Telegraph | Daily Mail | Guardian | Daily Mirror | Total |
|----------------------------------|--------------------------------|-----------|------------|----------|--------------|-------|
| <b>Number of articles</b>        |                                | 25        | 20         | 11       | 12*          | 68    |
| <b>Frequency of article type</b> | Study report                   | 10        | 13         | 6        | 8            | 37    |
|                                  | Commentary                     | 3         | 4          | 2        | 0            | 9     |
|                                  | Q&A                            | 2         | 1          | 0        | 0            | 3     |
|                                  | Personal story                 | 0         | 1          | 1        | 0            | 2     |
|                                  | News report                    | 1**       | 1**        | 0        | 1**          | 3     |
|                                  | Letters                        | 2         | 2          | 0        | 0            | 4     |
|                                  | Expert/'celebrity' commentator | 1         | 2          | 0        | 1            | 4     |
|                                  | Other                          | 1         | 1          | 2        | 0            | 4     |
| <b>Statins main topic</b>        | Main topic                     | 18        | 14         | 10       | 3            | 45    |
|                                  | Secondary topic                | 7         | 6          | 1        | 8            | 22    |
| <b>Positive/negative</b>         | Positive                       | 2         | 8          | 3        | 4            | 17    |
|                                  | Neutral                        | 3         | 2          | 5        | 3            | 13    |
|                                  | Negative                       | 20        | 10         | 3        | 4            | 37    |

\* One article was excluded.

\*\* Publication of NICE and US guidelines on the use of statins

Coverage by outlet by week is shown in **Graph 1**. There is considerable variation, with peaks in coverage weeks commencing 11 February and 18 March. The NICE revised draft guidelines were published on 12 February,[29] covered in 11 articles, prompting the earlier peak. A systematic review of the side-effects of statins[9] was widely reported a month later. In only five of the 26 weeks was there no story about statins.

**Graph 1 Coverage by outlet by week, October 2013 – March 2014**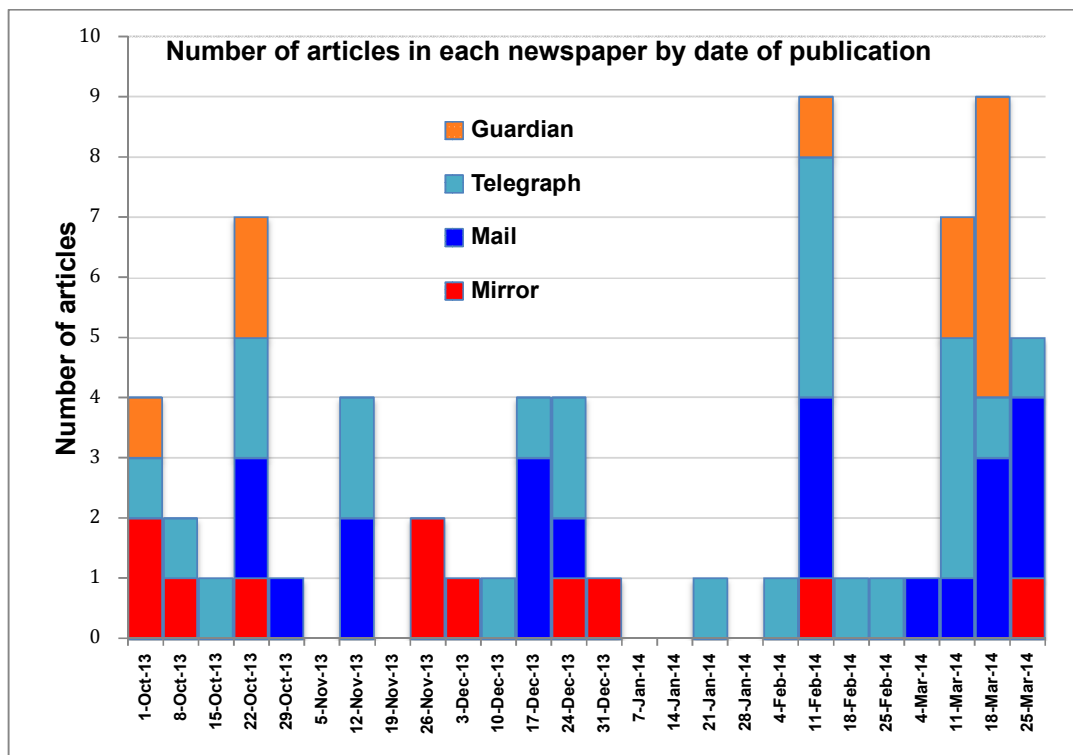

The ratio of negative to positive coverage was greater than 2:1 overall (**Graph 2**).

The more right-leaning papers exhibited a ratio of 3:1 negative to positive articles, where the left leaning press had equal proportions of each. The Telegraph had the highest differential with a 10:1 ratio of negative to positive stories. Articles on studies reporting collateral benefits (statins benefiting people with multiple sclerosis or dementia for example) were more likely to portray statins in a positive light.

**Graph 2 Positive and negative coverage**

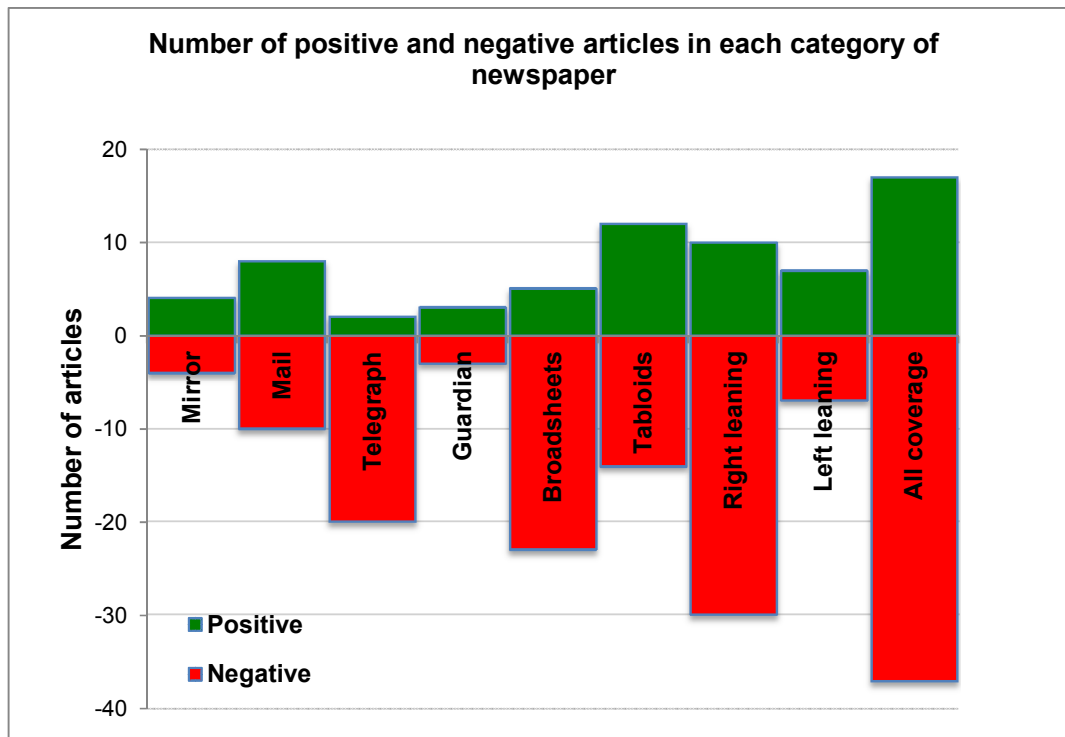

### Thematic analysis

The themes with the highest number of mentions selected for detailed analysis were: medicalisation versus lifestyle modification; the effectiveness of statins in the light of their side-effects; and trust of those advocating statin therapy.

#### *Medicalisation versus lifestyle modification*

The term “medicalisation” is used by three of the four sampled media, both in quotes from contributors and by the article authors. In most cases it is used to denote the introduction of drug treatment for use in an otherwise apparently healthy population. It is used with an exclusively negative meaning:

*“the “medicalisation” of people who are not ill... turning five million middle-*

1  
2  
3 *aged and predominantly healthy men and women into statin-popping*  
4 *patients.*” [Mail]  
5  
6  
7

8  
9 *“It is a concern to have to mass medicalise the whole of the British public in*  
10 *this way”* [Telegraph] Britain will be confirmed *“the statins capital of Europe”*  
11  
12 [Mail]  
13  
14

15  
16  
17  
18 There is a language of passivity and control. People are “medicalised”,  
19 “medicated” or “*put on statins*” (emphasis added).  
20  
21

22  
23  
24 The majority of articles appear supportive of prescribing statins for those with  
25 established heart disease. The controversy centres on what proportion of those  
26 with risk factors for cardiovascular disease should receive statins as a primary  
27 preventative measure:  
28  
29  
30  
31  
32

33  
34  
35  
36 *“there are people who may be overweight or have raised blood pressure.*  
37 *They probably don’t have symptoms. They are not ill”* [Guardian]  
38  
39

40  
41  
42 *“we’ll be medicalising many relatively healthy patients”* [Mail] (emphasis  
43 added)  
44  
45  
46  
47  
48

49 The medical profession is seen to be focusing on the medical option in preference  
50 to promoting lifestyle change:  
51  
52

53  
54  
55  
56 *“doctors should first work with patients to put them less at risk... [by]*  
57  
58

1  
2  
3 *stopping smoking, drinking less, taking exercise and eating healthily.*" [Mail]  
4  
5

6  
7 However:

8  
9 It is *"simpler to reach for the pad and write out a prescription than to dole*  
10  
11 *out lifestyle advice"* [National Obesity Forum, Mail and Telegraph]  
12  
13

14  
15  
16 The public is also indicated to be at fault:

17  
18  
19  
20 *"There is a tendency... for patients (and doctors) to think that as long as*  
21  
22 *they're on statins, smoking or a poor diet doesn't really matter";*  
23  
24 *"people will see them as a magic pill that allows them to tuck into three*  
25  
26 *pizzas a night and umpteen hamburgers with impunity"* ["leading  
27  
28 cardiologist", Mail]  
29  
30  
31

32  
33 Lifestyle measures could actually be the preferable medicine:  
34  
35

36  
37  
38 *"Exercise can be just as efficient as drugs in treating heart disease"* [study  
39  
40 report, Mirror]  
41  
42

43  
44 *"eating an apple a day is as effective as taking statins"* [medical  
45  
46 "campaigner", Mail]  
47  
48  
49  
50  
51  
52  
53  
54

55  
56 ***Effectiveness and side-effects of treatment***  
57  
58  
59  
60

1  
2  
3  
4 The positioning of “expert” opinion is important here. Who is most qualified to  
5 determine the impact of side-effects: clinician, trialist or patient?  
6  
7  
8  
9

10  
11 Evidence from published studies on the extent of side-effects is reported:  
12  
13

14  
15 *“the benefits of statins greatly exceed any side effects”* [Cholesterol trialists  
16 study report, Mail].  
17  
18  
19

20  
21 This is directly challenged by individuals:  
22  
23

24  
25 *NICE “will tell you that... one in 10,000 patients... will suffer severe muscular*  
26 *pain.... In contrast, reliable data from the real world... backed up by*  
27 *anecdotal evidence from my experience as a cardiac physician, suggests*  
28 *that the real figure... is closer to one in five.’* [cardiologist quoted in Mail]  
29  
30  
31  
32  
33  
34  
35

36  
37 *“I know of only three people who have been on statins – I am one of them –*  
38 *and we all experienced debilitating muscle aches”* [reader correspondence,  
39 Telegraph]  
40  
41  
42  
43  
44  
45

46  
47 The “noise” about side-effects may produce the equivalent of a “*nocebo effect*”:  
48  
49

50  
51 *“If we tell people about side effects,... we induce these unpleasant*  
52 *symptoms,... inflicting harm on our patients”; “We... shouldn’t scare people*  
53 *into experiencing side effects... or into avoiding a medication which might*  
54  
55  
56  
57  
58  
59  
60



1  
2  
3 *help them*” [“study author”, Guardian]  
4  
5

6  
7 Statins are portrayed as either villain or hero:  
8  
9

10  
11 *“in years to come, statins could be seen as being as dangerous as*  
12 *thalidomide*” [reader correspondence, Mail]  
13  
14

15  
16  
17  
18 *“Statins may reduce dementia by a third*” [study report, Telegraph]  
19  
20

21  
22 Over the six month sample period, statins were associated with potential  
23 beneficial effects on dementia, multiple sclerosis and erectile dysfunction.  
24  
25  
26

### 27 28 29 **Trust** 30

31  
32  
33 A related but distinct theme is trust. Where there is a weight of scientific  
34 evidence, there is traditionally expected to be trust in the results. However  
35 pharmaceutical companies, often designated “*Big Pharma*”, are almost universally  
36 negatively portrayed regardless of the political leanings of the sources, and there  
37 is an implied questioning of the value of any evidence from a pharmaceutical  
38 industry sponsored trial. An interesting question emerges, concerning which  
39 forms of evidence have the greater validity:  
40  
41  
42  
43  
44  
45  
46  
47  
48  
49

50  
51 NICE recommendations for lowering the threshold for statin treatment are:  
52

53 *“based on solid evidence and the public should trust them*” [US study  
54 authors quoted in Mail]  
55  
56  
57

1  
2  
3  
4  
5       *“The drug companies were saying this drug was the best thing since sliced*  
6  
7       *bread”*; *“their findings are contradicted by independent surveys”* and they are  
8  
9       *“contrary to the experience of many Telegraph readers”* [response to draft  
10  
11       NICE guidelines, Telegraph]  
12

13  
14  
15       *“trials run by the drug companies... are likely to be excessively favourable”*  
16  
17       [Harvard clinician, Mail]  
18  
19

20  
21  
22       these same trials are refuted by *“anecdotal accounts... real world data...*  
23  
24       *[and] my experience as a cardiac physician”* [cardiologist, Mail]  
25  
26  
27

28  
29       The confidentiality of some of the trial data leads to suspicion of what the data  
30  
31       contain:  
32  
33

34  
35  
36       There is no reason *“to accept the analysis of the Oxford team who have*  
37  
38       *seen the data at face value just because they are big and important and*  
39  
40       *professors at Oxford University... . Either they don't have a vast chunk of*  
41  
42       *data or they do and they are not publishing it”* [“Scottish GP and author”,  
43  
44       Guardian]  
45  
46  
47

48  
49       Although some academic bodies are still largely to be trusted, for example *“the*  
50  
51       *respected Cochrane group”* [Guardian], other organisations or individuals are  
52  
53       contaminated by association:  
54  
55

1  
2 there are “arrangements between Big Pharma and academic institutions  
3  
4 [and] vested interests in the research” [Telegraph]  
5  
6  
7

8  
9 Political and administrative organisations receive a mixed portrayal:  
10

11  
12  
13 “the government’s advice is based on a wealth of evidence. The BMJ article  
14  
15 is based on opinion” [Public Health England director quoted in Guardian]  
16

17  
18  
19  
20 “how can we explain this big gap between... personal experience... of  
21  
22 doctors and patients... and official bodies such as NICE?” [Mail]  
23

24  
25  
26  
27 “NICE seems to be siding firmly with the drug companies and relying on  
28  
29 industry-sponsored statistics” [Mail]  
30

31  
32  
33 Family doctors receive consistently negative coverage. Medical authority is  
34  
35 portrayed as siding with, or indirectly influenced by, the pharmaceutically  
36  
37 sponsored institutions. Doctors are accused of “inexcusable deviousness” in their  
38  
39 methods for fulfilling screening quotas and in disguising a prescription for statins  
40  
41 as “lipid tablets” [Telegraph]. There is a risk of:  
42  
43  
44

45  
46  
47 “more aggressive prescribing of the [statin] medications by family doctors,  
48  
49 whose pay is linked to take-up of the pills among their patients” [Mail]  
50

## DISCUSSION

This study found that the newsprint media coverage of statins was substantially influenced by the publication of national guidance and by coverage in the medical journals of clinical studies, reports and comment. Statins received a predominantly negative portrayal overall, notably in the more right-leaning press. Specifically, there was considerable coverage of reported side-effects, concern about the balance between medication and lifestyle changes in primary prevention, and a questioning of the reliability of evidence from research institutions, scientists and clinicians in the light of their potential allegiances and funding.

The findings are consistent with some other studies but also highlight some departures from previous research. The strongest criticism of statins and their effects appears to reflect very closely the debates seen in the medical journals over the same time period.[10-12] Whilst I did not compare coverage between the medical and popular press in any detail, it was evident that there was a substantial commonality of content. In the popular press however there is no discernible difference in the reporting of what the scientific community might describe as important, high quality studies compared with the reporting of small studies with high potential for bias. All views are portrayed with equal weight and seriousness. One notable trend is that reports of new links between, for example, statins and dementia, or statins and impotence, tend to be more uncritical than reports of the use of statins in preventing heart disease. This is also consistent with findings from elsewhere.[30] With a new study, it is simply the results that

1  
2 are reported, whereas with the role of statins in the prevention of heart disease, it  
3 is the debate and controversy that is represented. In terms of the medication  
4 versus lifestyle debate, clinical studies disagree about the extent to which health  
5 promoting behaviours are actually affected by long term statin use.[31-33]  
6  
7 However the newspaper coverage contained a largely judgmental vocabulary  
8 around the selection of a medical treatment pathway, suggesting that people who  
9 take tablets, or doctors who prescribe them, may be abdicating personal  
10 responsibility for health. The question of trust in institutions has also been  
11 highlighted in other research. Commentators have identified a similar tendency in  
12 the media to exaggerate and seek to mobilise opinion against a “supposed threat”  
13 or conspiracy.[34] In contrast, where previous research has placed clinicians -  
14 family doctors in particular - high in the hierarchy of public trust,[20, 35] this study  
15 found no evidence of positive reporting of the medical profession in relation to  
16 statins.  
17  
18  
19  
20  
21  
22  
23  
24  
25  
26  
27  
28  
29  
30  
31  
32  
33  
34  
35

36 One question arising from this study is whether statins have a distinct status with  
37 respect to the debate. The polarisation of good drug/bad drug is not new. Other  
38 studies have reported a similarly dichotomised approach in relation to other  
39 medical treatments.[36, 21] There are parallels with the representation of the  
40 diagnosis and treatment of hypertension, another frequently invisible “sickness”  
41 addressed by long term, preventative medication. However in the case of statins,  
42 the threshold for treatment appears increasingly to be driven by age rather than  
43 specific clinical indicators. (The QRisk cardiovascular risk calculator is strongly  
44 influenced by age.) Everyone could eventually become a candidate for  
45 medicalisation, however healthy their lifestyle and however low their cholesterol  
46  
47  
48  
49  
50  
51  
52  
53  
54  
55  
56  
57  
58  
59  
60

1  
2 ratio.  
3  
4  
5  
6

7 The study highlights a fundamental point concerning the significance of the  
8 portrayal of medical issues in the media: is it important that even someone  
9 reading across the whole range of newspaper coverage sampled for this study  
10 would receive a negative impression of the value of the scientific evidence, and  
11 the benefit of statins, when current clinical guidance recommends their use?  
12 Coverage in the popular press highlights the confusing messages projected by  
13 science and research worldwide. There is no mediating discourse leading people  
14 through the pendulum findings of one study or learned commentator after another.  
15 The “noise” of the continuing debate may even be frightening people away from  
16 taking their prescribed medications, and increasing cardiovascular mortality.[17,  
17 27] This raises an ethical question around the desirability of presenting all  
18 viewpoints, however well or ill-evidenced, at the risk of deterring people from  
19 acting responsibly with regard to their health. Other studies have suggested there  
20 is scope for the scientific and medical worlds to articulate their messages more  
21 carefully for popular media consumption.[36, 37, 25] Alternatively, the rawness  
22 and transparency of the debate may be a good thing. The ability to see and  
23 critique another scientist’s work is valued by researchers, and it may also be of  
24 benefit to a non-medical audience to hear the challenge and defence of each  
25 viewpoint played out in the public arena. One response is for subject experts to  
26 provide an evidence-based commentary on scientific issues of public interest,  
27 along the lines of NHS Choices’ “Behind the Headlines”, developed by Sir Muir  
28 Gray because “In the same way that people need clean, clear water, they have a  
29 right to clean, clear knowledge”. [38]  
30  
31  
32  
33  
34  
35  
36  
37  
38  
39  
40  
41  
42  
43  
44  
45  
46  
47  
48  
49  
50  
51  
52  
53  
54  
55  
56  
57  
58  
59  
60

1  
2  
3  
4  
5 This study adds insight into the portrayal of preventative medications, and related  
6 clinical policy, in the media. There are potential implications for clinicians, study  
7 authors, policy makers and public health practitioners. It may be of value for  
8 health practitioners to be aware of the messages their patients and the public are  
9 predominantly hearing in relation to their medications. There is also considerable  
10 scope for all health experts to promote a more media-friendly, evidence-based  
11 narrative on health topics of public interest or concern.  
12  
13  
14  
15  
16  
17  
18  
19  
20  
21

22 Recommendations for further research include a comparison of a wider number of  
23 outlets and different areas of medicine over a longer period of time, a comparison  
24 of the medical and popular media coverage in detail, and further exploration of the  
25 impact of media coverage on reader health behaviours.  
26  
27  
28  
29  
30  
31  
32  
33  
34  
35  
36  
37  
38  
39

40 **Contributorship statement:** no contributing authors.

41  
42 **Declaration of competing interests:** none.

43  
44 **Funding:** none received.

45  
46 **Data sharing statement:** no supplementary data to be shared.

47  
48 **Ethical approval:** not required.

49  
50 **Transparency declaration:** The manuscript is an honest, accurate and  
51 transparent account of the study reported. No important aspects have been  
52 omitted.  
53  
54  
55  
56  
57  
58  
59  
60

## REFERENCES

1 National Institute for Health and Care Excellence. Lipid modification: cardiovascular risk assessment and the modification of blood lipids for the primary and secondary prevention of cardiovascular disease. NICE clinical guideline 181 2014.

2 Joint British Societies. Prepared by: British Cardiac Society, British Hypertension Society, Diabetes UK, HEART UK, Primary Care Cardiovascular Society, The Stroke Association. JBS 2: Joint British Societies' guidelines on prevention of cardiovascular disease in clinical practice. *Heart* 2005;91:suppl5v1-v52 doi:10.1136/hrt.2005.079988.

3 Baigent C, Blackwell L, Emberson J, et al. Cholesterol Treatment Trialists' (CCT) Collaboration. Efficacy and safety of more intensive lowering of LDL cholesterol: A meta-analysis of data from 170 000 participants in 26 randomised trials. *Lancet* 2010;376(9753):1670-1681.29.

4 Baigent C, Keech A, Kearney P, et al. Cholesterol Treatment Trialists' (CTT) Collaboration. Efficacy and safety of cholesterol-lowering treatment: prospective meta-analysis of data from 90,056 participants in 14 randomised trials of statins. *Lancet* 2005;366(9493):1267-1278.33.

5 National Institute for Health and Care Excellence. Lipid modification: cardiovascular risk assessment and the modification of blood lipids for the primary and secondary prevention of cardiovascular disease, *NICE clinical guideline 181*, 2014.

6 National Institute for Health and Care Excellence Guideline Development Group. Lipid modification: cardiovascular risk assessment and the modification of blood lipids for the primary and secondary prevention of cardiovascular disease, *NICE Clinical guideline, methods, evidence and recommendations*, draft for consultation 2014.

7 Taylor F, Huffman M, Macedo A, et al. Statins for the primary prevention of cardiovascular disease. *Cochrane Database of Systematic Reviews* 2013; Issue 1. Art.No.:CD004816. DOI:10.1002/14651858.CD004816.pub5.

8 Mihaylova B, Voysey M, Fray A, et al. Cholesterol Treatment Trialists' (CTT) Collaboration. The effects of lowering LDL cholesterol with statin therapy in people at low risk of vascular disease: Meta-analysis of individual data from 27 randomised trials. *Lancet* 2012;380(9841):581-590.

9 Finegold J, Manisty C, Goldacre B, et al. What proportion of symptomatic side effects in patients taking statins are genuinely caused by the drug? Systematic review of randomized placebo-controlled trials to aid individual patient choice, DOI: 10.1177/2047487314525531 published online 12 March 2014. *European*



1  
2  
3 *Journal of Preventive Cardiology* 2014.

4  
5 10 Abramson J, Rosenberg H, Jewell N, et al. Should people at low risk of  
6 cardiovascular disease take a statin? *British Medical Journal* 2013;347:f6123.

7  
8 11 Malhotra, A. Saturated fat is not the issue, *British Medical Journal*  
9 2013;347:f6340.

10  
11 12 Godlee, F. (2014) The BMJ and authors withdraw statements suggesting that  
12 adverse events occur in 18-20% of patients, *British Medical Journal*,  
13 2014;348:g3306.

14  
15 13 Zhang H, Plutzky J, Skentzos S, et al. Discontinuation of Statins in Routine  
16 Care Settings: A Cohort Study. *Annals of Internal Medicine* 2013;158:526-534.  
17 doi:10.7326/0003-4819-158-7-201304020-00004.

18  
19 14 van Staa T, Smeeth L, Ng E, et al. The efficiency of cardiovascular risk  
20 assessment: do the right patients get statin treatment? *Heart* 2013;99:1597-1602.

21  
22 15 Wu J, Zhu S, Yao G, et al. Patient Factors Influencing the Prescribing of Lipid  
23 Lowering Drugs for Primary Prevention of Cardiovascular Disease in UK General  
24 Practice: A National Retrospective Cohort *PloSone* 2013;8.7:e67611.

25  
26 16 Rose G. *Rose's Strategy of Preventive Medicine* 2008;Oxford University Press.

27  
28 17 Goldacre B. Statins are a mess: we need better data, and shared decision  
29 making, Editorial. *BMJ* 2014;348:g3306.

30  
31 18 Goldacre B. Statins have no side effects? This is what our study really found.  
32 *The Guardian*. 14 March 2014.

33  
34 19 Goldacre B. *BadScience.net*, 13 March 2014;  
35 [http://www.badscience.net/2014/03/statins-have-no-side-effects-what-our-study-  
36 really-found-its-fixable-flaws-and-why-trials-transparency-matters-again/](http://www.badscience.net/2014/03/statins-have-no-side-effects-what-our-study-really-found-its-fixable-flaws-and-why-trials-transparency-matters-again/)  
37 (Accessed July 2014)

38  
39 20 Duffy B, Rowden L. *You are what you read? How newspaper readership is  
40 related to views*. Mori Social Research Institute 2005:P32.

41  
42 21 Seale C. Health and media: an overview. *Sociology of health & illness* 2003;25  
43 (6):513-531.

44  
45 22 van Hunsel F, van Puijenbroek E, deJong-van den Berg L, et al. Media  
46 attention and the influence on the reporting odds ratio in disproportionality  
47 analysis: an example of patient reporting of statins, *Pharmacoepidemiol Drug Saf*  
48 2010;19(1):26-32. Doi:10.1002/pds.1865.

49  
50 23 Eberth J, Kline N, Moskowitz D, Montealegre J, Scheurer M. The Role of  
51 Media and the Internet on Vaccine Adverse Event Reporting: A Case Study of  
52  
53  
54

1  
2 Human Papillomavirus Vaccination, *Journal of Adolescent Health*  
3 2013;Volume54;Issue 3;289 – 295.  
4

5  
6 24 Fasse K, Gamble G, Cundy T, et al. Impact of television coverage on the  
7 number and type of symptoms reported during a health scare: a retrospective pre-  
8 post observational study. *British Medical Journal* 2012;2:e001607  
9 doi:10.1136/bmjopen-2012-001607.  
10

11  
12 25 Grilli R, Ramsay C, Minozzi S. Mass media interventions: effects on health  
13 services utilisation. *Cochrane Database Syst Rev* 2002;Issue1(1).  
14

15  
16 26 Davies S. Letter to the Academy of Medical Sciences, February 2015. Quoted  
17 in The Guardian 16 June 2015.

18 [http://www.theguardian.com/society/2015/jun/16/chief-medical-officer-calls-](http://www.theguardian.com/society/2015/jun/16/chief-medical-officer-calls-review-after-statins-tamiflu-storm)  
19 [review-after-statins-tamiflu-storm](http://www.theguardian.com/society/2015/jun/16/chief-medical-officer-calls-review-after-statins-tamiflu-storm) (Accessed 20 August 2015)

20 Quoted in the Pharmaceutical Journal of the Royal Pharmaceutical Society 17  
21 June 2015. [http://www.pharmaceutical-journal.com/news-and-](http://www.pharmaceutical-journal.com/news-and-analysis/news/englands-top-doctor-orders-review-into-how-medicines-are-evaluated/20068759.article)  
22 [analysis/news/englands-top-doctor-orders-review-into-how-medicines-are-](http://www.pharmaceutical-journal.com/news-and-analysis/news/englands-top-doctor-orders-review-into-how-medicines-are-evaluated/20068759.article)  
23 [evaluated/20068759.article](http://www.pharmaceutical-journal.com/news-and-analysis/news/englands-top-doctor-orders-review-into-how-medicines-are-evaluated/20068759.article) (Accessed 20 August 2015)  
24

25  
26 27 Nielsen S, Nordestgaard B. Negative statin-related news stories decrease  
27 statin persistence and increase myocardial infarction and cardiovascular mortality:  
28 a nationwide prospective cohort study, *European Heart Journal*  
29 2015;doi:10.1093/eurheartj/ehv641.  
30

31  
32 28 Macnamara J. Media content analysis: Its uses, benefits and best practice  
33 methodology. *Asia Pacific Public Relations Journal* 2005;6(1),1-34:P20.  
34

35  
36 29 National Institute for Health and Care Excellence Lipid modification:  
37 cardiovascular risk assessment and the modification of blood lipids for the primary  
38 and secondary prevention of cardiovascular disease, draft update for consultation,  
39 NICE guideline 2014.  
40

41  
42 30 Hernandez J, Mantel-Teeuwisse A, van Thiel G, et al. Publication trends in  
43 newspapers and scientific journals for SSRIs and suicidality: a systematic  
44 longitudinal study, *British Medical Journal* 2011;Dec 6;1(2):e000290. doi:  
45 10.1136/bmjopen-2011-000290.  
46

47  
48 31 Sugiyama T, Tsugawa Y, Tseng C, et al. Different Time Trends of Caloric and  
49 Fat Intake Between Statin Users and Nonusers Among US Adults. Gluttony in the  
50 Time of Statins? *JAMA Internal Medicine*  
51 2014;doi:10.1001/jamainternmed.2014.1927.  
52

53  
54 32 Lofgren I, Greene G, Schembre S, et al. Comparison of diet quality, physical  
55 activity and biochemical values of older adults either reporting or not reporting use  
56 of lipid-lowering medication. *Journal Nutritional Health Aging* 2010;14(2):168-172.  
57  
58  
59  
60

1  
2  
3 33 Lytsy P, Burell G, Westerling R. Cardiovascular risk factor assessments and  
4 health behaviours in patients using statins compared to a non-treated population.  
5 *Int Journal Behav Med* 2012;19(2):134-142.

6  
7 34 McQuail D. The influence and effects of mass media. *Mass communication*  
8 *and society* 1977;70-94:P15.

9  
10 35 Gale N, Greenfield S, Gill P, et al. Patient and general practitioner attitudes to  
11 taking medication to prevent cardiovascular disease after receiving detailed  
12 information on risks and benefits of treatment: a qualitative study *BMC Family*  
13 *Practice* 2011;12:59doi:10.1186/1471-2296-12-59:P5.

14  
15 36 Prosser H. Marvellous medicines and dangerous drugs: the representation of  
16 prescription medicine in the UK newsprint media. *Public Understanding of*  
17 *Science* 2010;19(1):52-69.

18  
19 37 Danovaro-Holliday M, Wood A, LeBaron C. Rotavirus vaccine and the news  
20 media, 1987-2001, *JAMA: the Journal of the American Medical Association*  
21 2002;Mar20;287(11):1455-62.

22  
23 38 Gray M. *Behind the headlines, NHS Choices* 2011;  
24 <http://www.nhs.uk/news/Pages/about-behind-the-headlines.aspx> (Accessed 2 July  
25 2014)

# BMJ Open

## A CONTENT ANALYSIS OF THE REPRESENTATION OF STATINS IN THE BRITISH NEWSPRINT MEDIA

|                                 |                                                                                    |
|---------------------------------|------------------------------------------------------------------------------------|
| Journal:                        | <i>BMJ Open</i>                                                                    |
| Manuscript ID                   | bmjopen-2016-012613.R1                                                             |
| Article Type:                   | Research                                                                           |
| Date Submitted by the Author:   | 27-Jul-2016                                                                        |
| Complete List of Authors:       | Chisnell, Julia; PenCLAHRC, Institute of Health Research                           |
| <b>Primary Subject Heading</b>: | Public health                                                                      |
| Secondary Subject Heading:      | Cardiovascular medicine                                                            |
| Keywords:                       | Statins, Content analysis, Cardiovascular medicine, Medicalisation, Media coverage |
|                                 |                                                                                    |

SCHOLARONE™  
Manuscripts

Peer Review Only

1  
2  
3  
4  
5  
6  
7  
8  
9  
10  
11  
12  
13  
14  
15  
16  
17  
18  
19  
20  
21  
22  
23  
24  
25  
26  
27  
28  
29  
30  
31  
32  
33  
34  
35  
36  
37  
38  
39  
40  
41  
42  
43  
44  
45  
46  
47  
48  
49  
50  
51  
52  
53  
54  
55  
56  
57  
58  
59  
60

# A CONTENT ANALYSIS OF THE REPRESENTATION OF STATINS IN THE BRITISH NEWSPRINT MEDIA

Author: Chisnell, J.

J M Chisnell  
Specialty Registrar in Public Health  
University of Exeter  
Email: [J.M.Chisnell@exeter.ac.uk](mailto:J.M.Chisnell@exeter.ac.uk)  
Tel: 07568-543585

Contact address:

PenCLAHRC, Institute of Health Research  
University of Exeter Medical School  
St Luke's Campus  
Exeter  
EX1 2LU

Keywords: Statins, cardiovascular medicine, content analysis, media coverage, medicalisation

Wordcount excluding title page, abstract, references and tables: 3255

Tables and graphs: 2 tables, 2 graphs

## ABSTRACT

### *Objective*

This study reviewed the news media coverage of statins, seeking to identify specific trends or differences in viewpoint between media outlets and examine common themes.

### *Design*

The study is a content analysis of the frequency and content of the reporting of statins in a selection of the British newsprint media. It involved an assessment of the number, timing and thematic content of articles followed by a discourse analysis examining the underlying narratives. The sample was the output of four UK newspapers, covering a broad-spectrum readership, over a six month timeframe 1 October 2013 - 31 March 2014.

### *Results*

A total of 67 articles included reference to statins. The majority (39, 58%) were reporting or responding to publication of a clinical study. The ratio of negative to positive coverage was greater than 2:1 overall. In the more politically right-leaning newspapers, 67% of coverage was predominantly negative (30/45 articles); 32% in the more left-leaning papers (7/22 articles). Common themes were:

- the perceived 'medicalisation' of the population;

- the balance between lifestyle modification and medical treatments in the primary prevention of heart disease;
- side effects and effectiveness of statins;
- pharmaceutical sponsorship, and implications for the reliability of evidence;
- trust between the public and government, institutions, research organisations and the medical profession.

### **Conclusions**

Newsprint media coverage of statins was substantially influenced by the publication of national guidance and by coverage in the medical journals of clinical studies and comment. Statins received a predominantly negative portrayal, notably in the more right-leaning press. There were shared themes: concern about the balance between medication and lifestyle change in the primary prevention of heart disease; the adverse effects of treatment; and a questioning of the reliability of evidence from research institutions, scientists and clinicians in the light of their potential allegiances and funding.

### **Strengths and limitations of this study**

- The use of media websites for data collection may have excluded some material which was only available in the print versions, and conversely included some material not available in print.

- The pragmatic selection of the study timescale and media selection may have reduced the representativeness and therefore generalisability of the study; however, the sampling strategy was designed to ensure that the sources represented a reasonable range and diversity of the established newspaper media.
- There was a single researcher and not a research team, leading to a potential risk of bias or incompleteness in the identification and selection of articles and the analysis; however research questions and methods were clearly set out at the start and consistently followed, to ensure validity.
- Blinding was not strictly possible, but articles were coded by a unique numerical identifier to reduce bias during the thematic analysis and an inductive approach was applied to ensure that the themes were dictated by the evidence emerging from the texts and not imposed by the researcher.



## INTRODUCTION

UK clinical guidelines recommend the use of lipid lowering therapy for both secondary and primary prevention.[1, 2] This is based on published clinical trial evidence of effectiveness, cost-effectiveness,[1, 3-8] and the extent of side-effects.[7-9] There is debate in the clinical literature about the merits of the widespread and growing use of statins, questioning whether the 'right' patients are benefiting, whether the threshold for initiation of primary preventative treatment is too low, and the reliability of the evidence underpinning the guidelines.[10-16] The same issues are also covered in the lay media, where, however, the nature and extent of the debate is less well documented.

There is an interaction between the lay and clinical media, with the same commentators and topics or reported, or directly speaking, in both,[17-21] And importantly, there is evidence that the lay media influences health-related perceptions and behaviours, including reporting of side-effects, uptake of services and adherence to medication.[22-27] The Chief Medical Officer for England has called for a review into how the safety and efficacy of drugs is judged, prompted by concern about the representation of statins and other drugs "in both the medical and general press".[28] A recent Danish study, using national and regional media coverage as a proxy for individual exposure, found that negative statin-related news stories were associated with both early statin discontinuation and cardiovascular mortality.[29]

In the light of this relationship, it is relevant to examine the portrayal of statins in the media, and the messages that are being predominantly received. This study

1  
2 investigates the nature of the representation of statins in the newsprint media,  
3  
4 identifying the key themes, trends, characteristics and viewpoints.  
5  
6  
7  
8  
9  
10  
11  
12  
13  
14  
15  
16  
17  
18  
19  
20  
21  
22  
23  
24  
25  
26  
27  
28  
29  
30  
31  
32  
33  
34  
35  
36  
37  
38  
39  
40  
41  
42  
43  
44  
45  
46  
47  
48  
49  
50  
51  
52  
53  
54  
55  
56  
57  
58  
59  
60

For peer review only

## METHOD

A descriptive and thematic analysis of the frequency of the coverage of statins in the UK newsprint media was undertaken. Media were selected with the aim of obtaining broad spectrum coverage reflecting a range of editorial leanings and readerships. An initial screening sample was undertaken in order to pilot the methodology and to consolidate the questions and sampling strategy for the main research.[30] This identified what would be practical for one researcher to collect, and enabled refinement of the range and type of outlets, the time period and the type of articles for inclusion in the main data collection. The sampling frame selected for the main study was the UK newsprint media. A purposive sampling strategy was followed, with newspapers selected on the basis that they were accessible, able to be searched and analysed by one researcher in the time available, and demographically, geographically and politically representative of a broad spectrum readership. The selected newspapers were The Daily Mail, The Daily Mirror, The Telegraph and The Guardian (**Table 1**). These are all national UK newspapers, recording the highest circulation<sup>1</sup>.

---

<sup>1</sup> The Sun recorded the highest circulation but The Sun and The Times were excluded because they did not have free to access websites.

**Table 1 Readership of selected newspapers 2013**[31, 32]

| Category                                  | Daily Mail                    | Daily Mirror | The Telegraph     | The Guardian |
|-------------------------------------------|-------------------------------|--------------|-------------------|--------------|
| Circulation                               | 1,863,000                     | 1,058,500    | 555,600           | 204,400      |
| Average age                               | 58                            | Not given    | 61                | 44           |
| Readership 65+                            | 45%                           | 34%          | 46%               | 21%          |
| Gender                                    | 51% female                    | 54% male     | 52% male          | 52% male     |
| Social class ABC1 <sup>2</sup>            | 64%                           | 43%          | 87%               | 89%          |
| Predominant geography [Mori 2005]         | 83% outside London & Scotland | North        | East & South East | London       |
| Predominant political stance <sup>3</sup> | Right                         | Left         | Centre right      | Centre left  |
| Market designation                        | Tabloid                       | Tabloid      | Broadsheet        | Broadsheet   |

Full texts of articles were searched by keyword and collected retrospectively from the websites of the selected media outlets over a continuous six month timeframe (1 October 2013 to 31 March 2014). The main search term was “statin” (“statins” did not retrieve all mentions.) A further search on “cholesterol”, “cardiovascular” and “heart disease” was undertaken to confirm all relevant articles had been captured. All articles with any recorded mention of statins were screened. All types of article were included.

Articles were downloaded and printed in full. Each article was given a unique reference number, to blind the researcher to source during the analysis, and key descriptors were recorded. A thematic data analysis was then undertaken. A coding scheme provided a consistent framework for data collection and analysis

<sup>2</sup> Social gradings A-E are based on 2011 census data. ABC1 represents higher & intermediate to clerical and junior occupations.

<sup>3</sup> Political stance reflects party affiliation in the most recent general election. (Right: Conservative, UKIP; left: Labour, Green; Centre right: Conservative, Liberal Democrat; Centre left: Labour, Liberal Democrat.)

1  
2 and enabled independent third party review. The exclusion criterion was  
3  
4 peripheral mention of statins with no associated reporting or comment.  
5  
6  
7

8  
9 The analysis was in two parts. An initial descriptive analysis mapped the findings  
10  
11 against the descriptive indicators, including whether the coverage was judged to  
12  
13 be predominantly positive or negative in terms of the arguments, language, and  
14  
15 terminology. Where the proportion of positive and negative comments appeared  
16  
17 similar, or where it was difficult to decide on the overall direction, a neutral  
18  
19 assessment was given. A more detailed qualitative analysis then examined the  
20  
21 nature of the discourses within the key themes, including viewpoints, assumptions  
22  
23 and language. Outlets were then tracked back and identified in the results. A  
24  
25 copy of the coding scheme is available as a supplementary document.  
26  
27  
28  
29  
30

31 There were no confidentiality issues associated with the study as all data sources  
32  
33 were within the public domain. Ethics Committee approval was not required.  
34  
35  
36  
37  
38  
39  
40  
41  
42  
43  
44  
45  
46  
47  
48  
49  
50  
51  
52  
53  
54  
55  
56  
57  
58  
59  
60

## RESULTS

Searches identified 67 articles during the time period. A timeline showing coverage by outlet by week is shown in **Figure 1**. There is considerable variation, with peaks in coverage weeks commencing 11 February and 18 March. The NICE revised draft guidelines were published on 12 February,[33] covered in 11 articles, prompting the earlier peak. A systematic review of the side-effects of statins[9] was widely reported a month later. In only five of the 26 weeks was there no story about statins.

**Figure 1 Coverage by outlet by week, October 2013 – March 2014**

In two thirds of articles (**Table 2**), statins were the main topic. The majority of articles (39, 58%) were reporting or responding to publication of a clinical study.

**Table 2** Number, stance, and theme of articles mentioning statins  
1 October 2013 – 31 March 2014

|                                  |                                | Telegraph | Daily Mail | Guardian | Daily Mirror | Total    |
|----------------------------------|--------------------------------|-----------|------------|----------|--------------|----------|
| <b>Number of articles</b>        |                                | 25        | 20         | 11       | 11*          | 67       |
| <b>Frequency of article type</b> | Study report/ response         | 10 (40%)  | 13 (65%)   | 6 (55%)  | 10 (91%)     | 39 (58%) |
|                                  | Commentary                     | 3 (12%)   | 1 (5%)     | 2 (18%)  | 0 (0%)       | 6 (9%)   |
|                                  | Q&A                            | 2 (8%)    | 1 (5%)     | 0 (0%)   | 0 (0%)       | 3 (4%)   |
|                                  | Personal story                 | 1 (4%)    | 1 (5%)     | 1 (9%)   | 0 (0%)       | 3 (4%)   |
|                                  | News report                    | 1** (4%)  | 1** (5%)   | 0 (0%)   | 1** (8%)     | 3 (4%)   |
|                                  | Letters                        | 4 (16%)   | 0 (0%)     | 0 (0%)   | 0 (0%)       | 4 (6%)   |
|                                  | Expert/'celebrity' commentator | 3 (12%)   | 2 (10%)    | 0 (0%)   | 0 (8%)       | 5 (7%)   |
|                                  | Other                          | 1 (4%)    | 1 (5%)     | 2 (18%)  | 0 (0%)       | 4 (6%)   |
| <b>Statins main topic</b>        | Main topic                     | 18 (72%)  | 14 (70%)   | 10 (91%) | 3 (25%)      | 45 (67%) |
|                                  | Secondary topic                | 7 (28%)   | 6 (30%)    | 1 (9%)   | 8 (67%)      | 22 (33%) |

\* One article was excluded.

\*\* Publication of NICE and US guidelines on the use of statins

The ratio of negative to positive coverage was greater than 2:1 overall. The more right-leaning papers exhibited a ratio of 3:1 negative to positive articles, where the left leaning press had equal proportions of each. The Telegraph had the highest differential with a 10:1 ratio of negative to positive stories (**Figure 2**). Articles on studies reporting collateral benefits (statins benefiting people with multiple sclerosis or dementia for example) were more likely to portray statins in a positive light.

**Figure 2** Positive and negative coverage

## Thematic analysis

The themes with the highest number of mentions selected for detailed analysis were: medicalisation versus lifestyle modification; the effectiveness of statins in the light of their side-effects; and trust of those advocating statin therapy.

### *Medicalisation versus lifestyle modification*

The term “medicalisation” is used by three of the four sampled media, both in quotes from contributors and by the article authors. In most cases it is used to denote the introduction of drug treatment for use in an otherwise apparently healthy population. It is used with an exclusively negative meaning:

*“the “medicalisation” of people who are not ill... turning five million middle-aged and predominantly healthy men and women into statin-popping patients.”* [Mail, 13/2/14]

*“It is a concern to have to mass medicalise the whole of the British public in this way”* [Telegraph, 11/2/14] Britain will be confirmed *“the statins capital of Europe”* [Mail, 12/2/14]

There is a language of passivity and control. People are “medicalised”, “medicated” or “*put on statins*” (emphasis added).



1  
2 The majority of articles appear supportive of prescribing statins for those with  
3 established heart disease. The controversy centres on what proportion of those  
4 with risk factors for cardiovascular disease should receive statins as a primary  
5 preventative measure:  
6  
7  
8  
9  
10

11  
12  
13 *“there are people who may be overweight or have raised blood pressure.*

14 *They probably don’t have symptoms. They are not ill”* [Guardian, 21/3/14]  
15

16  
17  
18  
19  
20 *“we’ll be medicalising many relatively healthy patients”* [Mail, 12/2/14]  
21

22 (emphasis added)  
23  
24  
25  
26

27 The medical profession is seen to be focusing on the medical option in preference  
28 to promoting lifestyle change:  
29  
30  
31  
32

33 *“doctors should first work with patients to put them less at risk... [by]*

34 *stopping smoking, drinking less, taking exercise and eating healthily.”* [Mail,  
35  
36  
37

38 13/3/14]  
39  
40  
41

42 However:

43  
44 *“[It is] “simpler to reach for the pad and write out a prescription” than to dole*

45 *out lifestyle advice”* [National Obesity Forum quoted in Mail and Telegraph,  
46  
47  
48

49 25/12/13]  
50  
51  
52

53 The public is also indicated to be at fault:  
54  
55  
56  
57  
58  
59  
60

1  
2  
3  
4  
5  
6  
7  
8  
9  
10  
11  
12  
13  
14  
15  
16  
17  
18  
19  
20  
21  
22  
23  
24  
25  
26  
27  
28  
29  
30  
31  
32  
33  
34  
35  
36  
37  
38  
39  
40  
41  
42  
43  
44  
45  
46  
47  
48  
49  
50  
51  
52  
53  
54  
55  
56  
57  
58  
59  
60

*“There is a tendency... for patients (and doctors) to think that as long as they’re on statins, smoking or a poor diet doesn’t really matter”;*  
*“people will see them as a magic pill that allows them to tuck into three pizzas a night and umpteen hamburgers with impunity”* [“leading cardiologist” quoted in Mail, 8/3/14, 13/2/14]

Lifestyle measures could actually be the preferable medicine:

*“Exercise can be just as efficient as drugs in treating heart disease”* [study report, Mirror, 2/10/13]

*“eating an apple a day is as effective as taking statins”* [medical “campaigner”, Telegraph, 2/3/14]

### ***Effectiveness and side-effects of treatment***

The positioning of “expert” opinion is important here. Who is most qualified to determine the impact of side-effects: clinician, trialist or patient?

Evidence from published studies on the extent of side-effects is reported:

*“the benefits of statins greatly exceed any side effects”* [Cholesterol trialists study report, Mail, 12/2/14].

1  
2  
3 This is directly challenged by individuals:  
4  
5  
6

7 *NICE “will tell you that... one in 10,000 patients... will suffer severe muscular*  
8 *pain.... In contrast, reliable data from the real world... backed up by*  
9 *anecdotal evidence from my experience as a cardiac physician, suggests*  
10 *that the real figure... is closer to one in five.’ [cardiologist quoted in Mail,*  
11 *13/2/14]*  
12  
13  
14  
15  
16  
17

18  
19  
20 *“I know of only three people who have been on statins – I am one of them –*  
21 *and we all experienced debilitating muscle aches” [reader correspondence,*  
22 *Telegraph, 15/3/14]*  
23  
24  
25  
26  
27

28  
29 The “noise” about side-effects may produce the equivalent of a “*nocebo effect*”:  
30  
31  
32

33 *“If we tell people about side effects,... we induce these unpleasant*  
34 *symptoms,... inflicting harm on our patients”; “We... shouldn’t scare people*  
35 *into experiencing side effects... or into avoiding a medication which might*  
36 *help them” [“study author”, Guardian, 14/3/14]*  
37  
38  
39  
40  
41  
42  
43  
44

45 Statins are portrayed as either villain or hero:  
46  
47  
48

49 *“in years to come, statins could be seen as being as dangerous as*  
50 *thalidomide” [reader correspondence, Mail, 14/11/13]*  
51  
52  
53  
54

55  
56 *“Statins may reduce dementia by a third” [study report, Telegraph, 30/12/13]*  
57  
58  
59  
60

1  
2  
3  
4 Over the six month sample period, statins were associated with potential  
5  
6 beneficial effects on dementia, multiple sclerosis and erectile dysfunction.  
7  
8  
9

### 10 **Trust**

11  
12  
13  
14  
15 A related but distinct theme is trust. The reliability of studies or guidelines is  
16  
17 traditionally linked to the weight of scientific evidence – usually RCT evidence -  
18  
19 underpinning them. However pharmaceutical companies, often designated “*Big*  
20  
21 *Pharma*”, are almost universally negatively portrayed, and there is an implied  
22  
23 questioning of the value of any evidence from a pharmaceutical industry  
24  
25 sponsored trial. An interesting question emerges, concerning which forms of  
26  
27 evidence have the greater validity:  
28  
29  
30  
31  
32

33 NICE recommendations for lowering the threshold for statin treatment are:

34  
35  
36 *“based on solid evidence and the public should trust them”* [US study  
37  
38 authors quoted in Mail, 13/11/13]

39  
40  
41  
42 *“The drug companies were saying this drug was the best thing since sliced*  
43  
44 *bread”*; *“their findings are contradicted by independent surveys”* and they are  
45  
46 *“contrary to the experience of many Telegraph readers”* [response to draft  
47  
48 NICE guidelines, Telegraph, 2/3/14]

49  
50  
51  
52  
53 *“trials run by the drug companies... are likely to be excessively favourable”*  
54  
55  
56 [Harvard clinician, Mail, 24/12/13]

1  
2  
3  
4 these same trials are refuted by *“anecdotal accounts... real world data...  
5  
6  
7 [and] my experience as a cardiac physician”* [cardiologist, Mail, 13/2/14]  
8  
9

10  
11 The confidentiality of some of the trial data leads to suspicion of what the data  
12  
13 contain:  
14

15  
16  
17  
18 There is no reason *“to accept the analysis of the Oxford team who have  
19  
20  
21  
22  
23  
24  
25  
26  
27  
28  
29  
30  
31  
32  
33  
34  
35  
36  
37  
38  
39  
40  
41  
42  
43  
44  
45  
46  
47  
48  
49  
50  
51  
52  
53  
54  
55  
56  
57  
58  
59  
60*  
Guardian, 21/3/14]

Although some academic bodies are still largely to be trusted, for example *“the  
respected Cochrane group”* [Guardian], other organisations or individuals are  
contaminated by association:

there are *“arrangements between Big Pharma and academic institutions  
[and] vested interests in the research”* [Telegraph, 15/3/14]

Political and administrative organisations receive a mixed portrayal:

*“the government’s advice is based on a wealth of evidence. The BMJ article  
is based on opinion”* [Public Health England director quoted in Guardian,  
23/10/13]

1  
2  
3  
4  
5  
6  
7  
8  
9  
10  
11  
12  
13  
14  
15  
16  
17  
18  
19  
20  
21  
22  
23  
24  
25  
26  
27  
28  
29  
30  
31  
32  
33  
34  
35  
36  
37  
38  
39  
40  
41  
42  
43  
44  
45  
46  
47  
48  
49  
50  
51  
52  
53  
54  
55  
56  
57  
58  
59  
60

*“how can we explain this big gap between... personal experience... of doctors and patients... and official bodies such as NICE?” [Mail, 18/3/14]*

*“NICE seems to be siding firmly with the drug companies and relying on industry-sponsored statistics” [Mail, 13/2/14]*

Family doctors receive consistently negative coverage. Medical authority is portrayed as siding with, or indirectly influenced by, the pharmaceutically sponsored institutions. Doctors are accused of *“inexcusable deviousness”* in their methods for fulfilling screening quotas and in disguising a prescription for statins as *“lipid tablets”* [Telegraph, 16/2/14]. There is a risk of:

*“more aggressive prescribing of the [statin] medications by family doctors, whose pay is linked to take-up of the pills among their patients” [Telegraph, 11/2/14].*

## DISCUSSION

This study found that the newsprint media coverage of statins was substantially influenced by coverage in the medical journals of clinical studies, reports and comment. Statins received a predominantly negative portrayal overall, notably in the more right-leaning press. Specifically, there was considerable coverage of reported side-effects, concern about the balance between medication and lifestyle changes in primary prevention, and a questioning of the reliability of evidence from research institutions, scientists and clinicians in the light of their potential allegiances and funding.

The findings are consistent with some other studies and also highlight some departures from previous research:

- The strongest criticism of statins and their effects in the media appears to reflect very closely the arguments presented in the medical journals over the same time period, although the weighting of the arguments may differ.[10-12] In the popular press there is no discernible difference in the reporting of what the scientific community might describe as important, high quality studies compared with the reporting of small studies, or opinion, with high potential for bias. All views are portrayed with equal weight and seriousness. Other studies have identified greater selectivity in reporting in the popular compared with the specialist media, with a greater focus on more controversial topics.[34]
- A notable trend I identified in the media is for reports of new links between,

1  
2 for example, statins and dementia, or statins and impotence, to be more  
3  
4 uncritical than reports of the use of statins in preventing heart disease. With  
5  
6 a new study, the results themselves are the story, whereas with the role of  
7  
8 statins in the prevention of heart disease, it is the debate and controversy  
9  
10 that is represented.  
11

- 12  
13 • In terms of the medication versus lifestyle debate, clinical studies disagree  
14  
15 about the extent to which health promoting behaviours are actually affected  
16  
17 by long term statin use.[35-37] However the newspaper coverage contained  
18  
19 a largely judgmental vocabulary around the selection of a medical treatment  
20  
21 pathway, suggesting that people who take tablets, or doctors who prescribe  
22  
23 them, may be abdicating personal responsibility for health.  
24  
25
- 26  
27 • The question of trust in institutions has also been highlighted in other  
28  
29 research. Commentators have identified a similar tendency in the media to  
30  
31 exaggerate and seek to mobilise opinion against a “supposed threat” or  
32  
33 conspiracy.[38] In contrast, where previous research has placed clinicians -  
34  
35 family doctors in particular - high in the hierarchy of public trust,[22, 39] this  
36  
37 study found no evidence of positive reporting of the medical profession in  
38  
39 relation to statins.  
40  
41  
42  
43  
44

45 One question arising from this study is whether statins have a distinct status with  
46  
47 respect to the debate. The polarisation of good drug/bad drug is not new. Other  
48  
49 studies have reported a similarly dichotomised approach in relation to other  
50  
51 medical treatments.[40, 23] There are parallels with the representation of the  
52  
53 diagnosis and treatment of hypertension, another frequently invisible “sickness”  
54  
55 addressed by long term, preventative medication.[16] However in the case of  
56  
57



1  
2  
3 statins, the threshold for treatment appears increasingly to be driven by age rather  
4  
5 than specific clinical indicators. (The QRisk cardiovascular risk calculator is  
6  
7 strongly influenced by age.) Everyone could eventually become a candidate for  
8  
9 medicalisation, however healthy their lifestyle and however low their cholesterol  
10  
11 ratio.  
12

13  
14  
15  
16 The study highlights a fundamental point concerning the significance of the  
17  
18 portrayal of medical issues in the media: is it important that even someone  
19  
20 reading across the whole range of newspaper coverage sampled for this study  
21  
22 would receive a negative impression of the value of the scientific evidence, and  
23  
24 the benefit of statins, when current clinical guidance recommends their use?  
25  
26 Coverage in the popular press highlights the confusing messages projected by  
27  
28 science and research worldwide. There is no mediating discourse leading people  
29  
30 through the pendulum findings of one study or learned commentator after another.  
31  
32 The “noise” of the continuing debate may even be frightening people away from  
33  
34 taking their prescribed medications, and increasing cardiovascular mortality.[17,  
35  
36 29] This raises an ethical question around the desirability of presenting all  
37  
38 viewpoints, however well or ill-evidenced, at the risk of deterring people from  
39  
40 acting responsibly with regard to their health. Other studies have suggested there  
41  
42 is scope for the scientific and medical worlds to articulate their messages more  
43  
44 carefully for popular media consumption.[40, 41, 27] Alternatively, the rawness  
45  
46 and transparency of the debate may be a good thing. The ability to see and  
47  
48 critique another scientist’s work is valued by researchers, and it may also be of  
49  
50 benefit to a non-medical audience to hear the challenge and defence of each  
51  
52 viewpoint played out in the public arena. One response is for subject experts to  
53  
54  
55  
56  
57  
58  
59  
60

1  
2 provide an evidence-based commentary on scientific issues of public interest,  
3  
4 along the lines of NHS Choices' "Behind the Headlines", developed by Sir Muir  
5  
6 Gray because "In the same way that people need clean, clear water, they have a  
7  
8 right to clean, clear knowledge".[42]  
9  
10

11  
12  
13 This study adds insight into the portrayal of preventative medications, and related  
14  
15 clinical policy, in the media. There are potential implications for clinicians, study  
16  
17 authors, policy makers and public health practitioners. By increasing awareness  
18  
19 of the messages their patients, readers and the public are predominantly hearing  
20  
21 in relation to their medications, it highlights the considerable scope for all health  
22  
23 experts to promote a more media-friendly, evidence-based narrative on health  
24  
25 topics of public interest or concern.  
26  
27  
28  
29  
30

31  
32 Recommendations for further research include a comparison of a wider number of  
33  
34 outlets and different areas of medicine over a longer period of time, a comparison  
35  
36 of the medical and popular media coverage in detail, and further exploration of the  
37  
38 impact of media coverage on reader health behaviours.  
39  
40  
41

42 **Contributorship statement:** no contributing authors.

43 **Declaration of competing interests:** none.

44 **Funding:** none received.

45 **Data sharing statement:** no supplementary unpublished data

46 **Ethical approval:** not required.

47  
48 **Transparency declaration:** The manuscript is an honest, accurate and  
49  
50 transparent account of the study reported. No important aspects have been  
51  
52 omitted.  
53  
54  
55  
56  
57

## REFERENCES

1 National Institute for Health and Care Excellence. Lipid modification: cardiovascular risk assessment and the modification of blood lipids for the primary and secondary prevention of cardiovascular disease. NICE clinical guideline 181 2014.

2 Joint British Societies. Prepared by: British Cardiac Society, British Hypertension Society, Diabetes UK, HEART UK, Primary Care Cardiovascular Society, The Stroke Association. JBS 2: Joint British Societies' guidelines on prevention of cardiovascular disease in clinical practice. *Heart* 2005;91:suppl5v1-v52 doi:10.1136/hrt.2005.079988.

3 Baigent C, Blackwell L, Emberson J, et al. Cholesterol Treatment Trialists' (CCT) Collaboration. Efficacy and safety of more intensive lowering of LDL cholesterol: A meta-analysis of data from 170 000 participants in 26 randomised trials. *Lancet* 2010;376(9753):1670-1681.29.

4 Baigent C, Keech A, Kearney P, et al. Cholesterol Treatment Trialists' (CTT) Collaboration. Efficacy and safety of cholesterol-lowering treatment: prospective meta-analysis of data from 90,056 participants in 14 randomised trials of statins. *Lancet* 2005;366(9493):1267-1278.33.

5 National Institute for Health and Care Excellence. Lipid modification: cardiovascular risk assessment and the modification of blood lipids for the primary and secondary prevention of cardiovascular disease, *NICE clinical guideline 181*, 2014.

6 National Institute for Health and Care Excellence Guideline Development Group. Lipid modification: cardiovascular risk assessment and the modification of blood lipids for the primary and secondary prevention of cardiovascular disease, *NICE Clinical guideline, methods, evidence and recommendations*, draft for consultation 2014.

7 Taylor F, Huffman M, Macedo A, et al. Statins for the primary prevention of cardiovascular disease. *Cochrane Database of Systematic Reviews* 2013; Issue 1. Art.No.:CD004816. DOI:10.1002/14651858.CD004816.pub5.

8 Mihaylova B, Voysey M, Fray A, et al. Cholesterol Treatment Trialists' (CTT) Collaboration. The effects of lowering LDL cholesterol with statin therapy in people at low risk of vascular disease: Meta-analysis of individual data from 27 randomised trials. *Lancet* 2012;380(9841):581-590.

9 Finegold J, Manisty C, Goldacre B, et al. What proportion of symptomatic side effects in patients taking statins are genuinely caused by the drug? Systematic review of randomized placebo-controlled trials to aid individual patient choice,

1  
2  
3  
4  
5  
6  
7  
8  
9  
10  
11  
12  
13  
14  
15  
16  
17  
18  
19  
20  
21  
22  
23  
24  
25  
26  
27  
28  
29  
30  
31  
32  
33  
34  
35  
36  
37  
38  
39  
40  
41  
42  
43  
44  
45  
46  
47  
48  
49  
50  
51  
52  
53  
54  
55  
56  
57  
58  
59  
60

DOI: 10.1177/2047487314525531 published online 12 March 2014. *European Journal of Preventive Cardiology* 2014.

10 Abramson J, Rosenberg H, Jewell N, et al. Should people at low risk of cardiovascular disease take a statin? *British Medical Journal* 2013;347:f6123.

11 Malhotra, A. Saturated fat is not the issue, *British Medical Journal* 2013;347:f6340.

12 Godlee, F. (2014) The BMJ and authors withdraw statements suggesting that adverse events occur in 18-20% of patients, *British Medical Journal*, 2014;348:g3306.

13 Zhang H, Plutzky J, Skentzos S, et al. Discontinuation of Statins in Routine Care Settings: A Cohort Study. *Annals of Internal Medicine* 2013;158:526-534. doi:10.7326/0003-4819-158-7-201304020-00004.

14 van Staa T, Smeeth L, Ng E, et al. The efficiency of cardiovascular risk assessment: do the right patients get statin treatment? *Heart* 2013;99:1597-1602.

15 Wu J, Zhu S, Yao G, et al. Patient Factors Influencing the Prescribing of Lipid Lowering Drugs for Primary Prevention of Cardiovascular Disease in UK General Practice: A National Retrospective Cohort *PloSone* 2013;8.7:e67611.

16 Rose G. *Rose's Strategy of Preventive Medicine* 2008;Oxford University Press.

17 Goldacre B. Statins are a mess: we need better data, and shared decision making, Editorial. *BMJ* 2014;348:g3306.

18 Goldacre B. Statins have no side effects? This is what our study really found. *The Guardian*. 14 March 2014.

19 Goldacre B. *BadScience.net*, 13 March 2014; <http://www.badscience.net/2014/03/statins-have-no-side-effects-what-our-study-really-found-its-fixable-flaws-and-why-trials-transparency-matters-again/> (Accessed July 2014)

20 Malhotra A. Saturated fat is not the issue, *BMJ* 2013;347:f6340.

21 Malhotra A. (2013) *BBC News*. 23 October 2013; <http://www.bbc.co.uk/news/health-24625808> (Accessed June 2016)

22 Duffy B, Rowden L. *You are what you read? How newspaper readership is related to views*. Mori Social Research Institute 2005:P32.

23 Seale C. Health and media: an overview. *Sociology of health & illness* 2003;25(6):513-531.

1  
2  
3 24 van Hunsel F, van Puijenbroek E, deJong-van den Berg L, et al. Media  
4 attention and the influence on the reporting odds ratio in disproportionality  
5 analysis: an example of patient reporting of statins, *Pharmacoepidemiol Drug Saf*  
6 2010;19(1):26-32. Doi:10.1002/pds.1865.

7  
8 25 Eberth J, Kline N, Moskowitz D, Montealegre J, Scheurer M. The Role of  
9 Media and the Internet on Vaccine Adverse Event Reporting: A Case Study of  
10 Human Papillomavirus Vaccination, *Journal of Adolescent Health*  
11 2013;Volume54;Issue 3;289 – 295.

12  
13 26 Fasse K, Gamble G, Cundy T, et al. Impact of television coverage on the  
14 number and type of symptoms reported during a health scare: a retrospective pre-  
15 post observational study. *British Medical Journal* 2012;2:e001607  
16 doi:10.1136/bmjopen-2012-001607.

17  
18 27 Grilli R, Ramsay C, Minozzi S. Mass media interventions: effects on health  
19 services utilisation. *Cochrane Database Syst Rev* 2002;Issue1(1).

20  
21 28 Davies S. Letter to the Academy of Medical Sciences, February 2015. Quoted  
22 in The Guardian 16 June 2015.

23  
24 [http://www.theguardian.com/society/2015/jun/16/chief-medical-officer-calls-](http://www.theguardian.com/society/2015/jun/16/chief-medical-officer-calls-review-after-statins-tamiflu-storm)  
25 [review-after-statins-tamiflu-storm](http://www.theguardian.com/society/2015/jun/16/chief-medical-officer-calls-review-after-statins-tamiflu-storm) (Accessed August 2015)

26  
27 Quoted in the Pharmaceutical Journal of the Royal Pharmaceutical Society 17  
28 June 2015. [http://www.pharmaceutical-journal.com/news-and-](http://www.pharmaceutical-journal.com/news-and-analysis/news/enlands-top-doctor-orders-review-into-how-medicines-are-evaluated/20068759.article)  
29 [analysis/news/enlands-top-doctor-orders-review-into-how-medicines-are-](http://www.pharmaceutical-journal.com/news-and-analysis/news/enlands-top-doctor-orders-review-into-how-medicines-are-evaluated/20068759.article)  
30 [evaluated/20068759.article](http://www.pharmaceutical-journal.com/news-and-analysis/news/enlands-top-doctor-orders-review-into-how-medicines-are-evaluated/20068759.article) (Accessed August 2015)

31  
32 29 Nielsen S, Nordestgaard B. Negative statin-related news stories decrease  
33 statin persistence and increase myocardial infarction and cardiovascular mortality:  
34 a nationwide prospective cohort study, *European Heart Journal*  
35 2015;doi:10.1093/eurheartj/ehv641.

36  
37 30 Macnamara J. Media content analysis: Its uses, benefits and best practice  
38 methodology. *Asia Pacific Public Relations Journal* 2005;6(1),1-34:P20.

39  
40 31 NRS Readership Estimates, National Readership Survey 2013.  
41 <http://www.nrs.co.uk/latest-results/nrs-print-results/newspapers-nrsprintresults/>  
42 (Accessed March 2014)

43  
44 32 TheMediaBriefing 2014. <https://www.themediabriefing.com/> [Accessed March  
45 2014]

46  
47 33 National Institute for Health and Care Excellence Lipid modification:  
48 cardiovascular risk assessment and the modification of blood lipids for the primary  
49 and secondary prevention of cardiovascular disease, draft update for consultation,  
50 NICE guideline 2014.

51  
52 34 Hernandez J, Mantel-Teeuwisse A, van Thiel G, et al. Publication trends in  
53 newspapers and scientific journals for SSRIs and suicidality: a systematic  
54

1  
2 longitudinal study, *British Medical Journal* 2011;Dec 6;1(2):e000290. doi:  
3 10.1136/bmjopen-2011-000290.  
4

5  
6 35 Sugiyama T, Tsugawa Y, Tseng C, et al. Different Time Trends of Caloric and  
7 Fat Intake Between Statin Users and Nonusers Among US Adults. Gluttony in the  
8 Time of Statins? *JAMA Internal Medicine*  
9 2014;doi:10.1001/jamainternmed.2014.1927.  
10

11  
12 36 Lofgren I, Greene G, Schembre S, et al. Comparison of diet quality, physical  
13 activity and biochemical values of older adults either reporting or not reporting use  
14 of lipid-lowering medication. *Journal Nutritional Health Aging* 2010;14(2):168-172.  
15

16  
17 37 Lytsy P, Burell G, Westerling R. Cardiovascular risk factor assessments and  
18 health behaviours in patients using statins compared to a non-treated population.  
19 *Int Journal Behav Med* 2012;19(2):134-142.  
20

21  
22 38 McQuail D. The influence and effects of mass media. *Mass communication*  
23 *and society* 1977;70-94:P15.  
24

25  
26 39 Gale N, Greenfield S, Gill P, et al. Patient and general practitioner attitudes to  
27 taking medication to prevent cardiovascular disease after receiving detailed  
28 information on risks and benefits of treatment: a qualitative study *BMC Family*  
29 *Practice* 2011;12:59doi:10.1186/1471-2296-12-59:P5.  
30

31  
32 40 Prosser H. Marvellous medicines and dangerous drugs: the representation of  
33 prescription medicine in the UK newsprint media. *Public Understanding of*  
34 *Science* 2010;19(1):52-69.  
35

36  
37 41 Danovaro-Holliday M, Wood A, LeBaron C. Rotavirus vaccine and the news  
38 media, 1987-2001, *JAMA: the Journal of the American Medical Association*  
39 2002;Mar20;287(11):1455-62.  
40

41  
42 42 Gray M. *Behind the headlines, NHS Choices* 2011;  
43 <http://www.nhs.uk/news/Pages/about-behind-the-headlines.aspx> (Accessed July  
44 2014)  
45  
46  
47  
48  
49  
50  
51  
52  
53  
54  
55  
56  
57  
58  
59  
60

1  
2  
3  
4  
5  
6  
7  
8  
9  
10  
11  
12  
13  
14  
15  
16  
17  
18  
19  
20  
21  
22  
23  
24  
25  
26  
27  
28  
29  
30  
31  
32  
33  
34  
35  
36  
37  
38  
39  
40  
41  
42  
43  
44  
45  
46  
47  
48  
49  
50  
51  
52  
53  
54  
55  
56  
57  
58  
59  
60

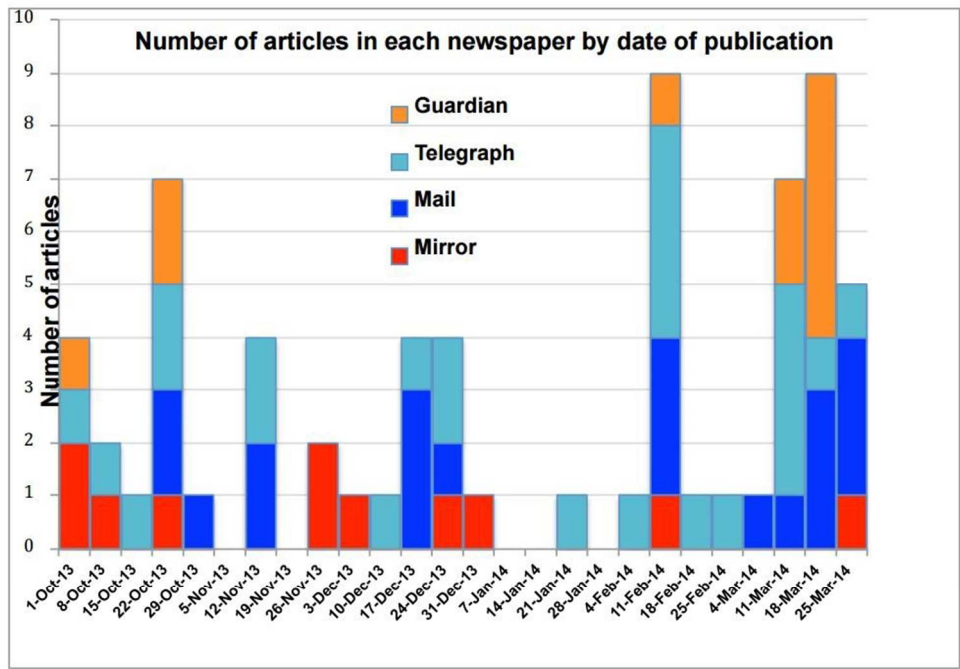

Figure 1

86x61mm (300 x 300 DPI)

ew only



1  
2  
3  
4  
5  
6  
7  
8  
9  
10  
11  
12  
13  
14  
15  
16  
17  
18  
19  
20  
21  
22  
23  
24  
25  
26  
27  
28  
29  
30  
31  
32  
33  
34  
35  
36  
37  
38  
39  
40  
41  
42  
43  
44  
45  
46  
47  
48  
49  
50  
51  
52  
53  
54  
55  
56  
57  
58  
59  
60

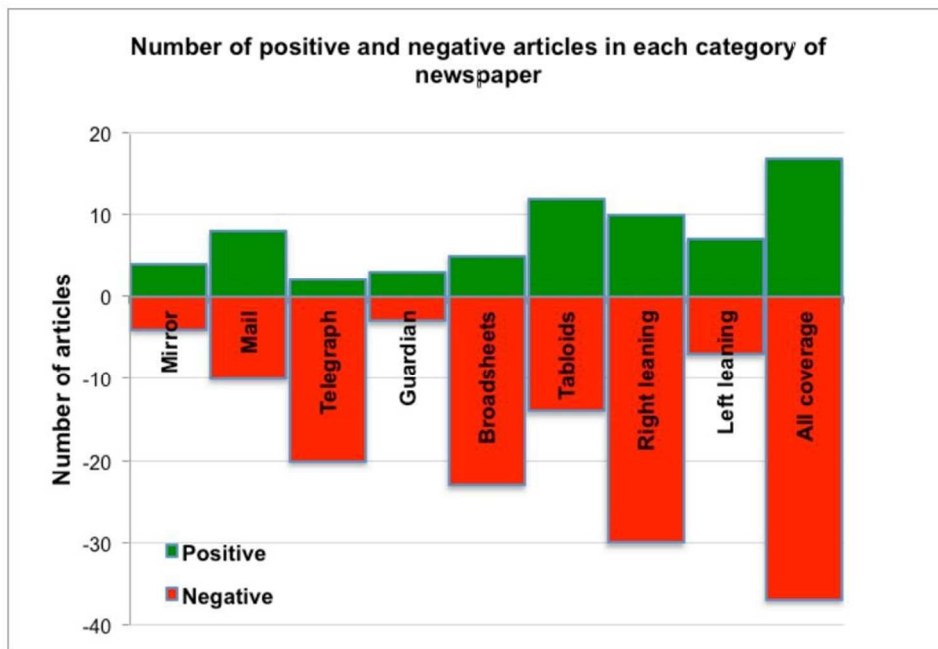

Figure 2

87x59mm (300 x 300 DPI)

view only



## DESCRIPTIVE AND ANALYTICAL CODING SCHEME

### General descriptors

- unique article reference number
- date
- publication/outlet
- type of article
  - news report
  - report of published/planned study
  - personal interest story
  - comment
  - dear doctor column/Q&A
  - other (specify)
- headline (write in full)
- sub-headline (write in full)
- reference to statins
  - main subject
  - secondary subject (eg. in article on heart disease or lifestyle measures)
  - passing comment
- pictures/images – brief description eg. older woman in hospital bed wearing gown & taking blue tablets from a cup; red tablets scattered on a blue background
- author

- 1  
2  
3  
4  
5  
6  
7  
8  
9  
10  
11  
12  
13  
14  
15  
16  
17  
18  
19  
20  
21  
22  
23  
24  
25  
26  
27  
28  
29  
30  
31  
32  
33  
34  
35  
36  
37  
38  
39  
40  
41  
42  
43  
44  
45  
46  
47  
48  
49  
50  
51  
52  
53  
54  
55  
56  
57  
58  
59  
60
- name
  - title (eg. Chief health correspondent; doctor; ‘celebrity’ columnist)
  - contributors/sources quoted
    - name
    - organisation/designation (eg. British Heart Foundation; King’s College London; NICE; BMJ editor; lay commentator)
      - medical ‘experts’
      - study authors
      - lay/public individuals or bodies
      - charities/support groups
  - treatment of statins overall
    - positive
    - negative
    - neutral
    - not categorisable
  - examples of positive/negative language
    - mention of harms, risks, side-effects
    - mention of benefits, positive collateral impact
      - eg. ‘few argue over effectiveness of statins for secondary prevention’; ‘statins help reduce signs of dementia by almost a third’
      - ‘significant risk of side-effects’; ‘never prescribe a statin for a loved one’
  - apparent purpose of the article
    - eg. reporting publication of new guidance
    - responding to publication of a new study

- reporting patient experience
- responding to reader letter
- reporting prominent medical debate in the BMJ/Lancet

### Constructed themes and suggested indicators

| Theme                     | Example constructs                                                                                                                                                                                                         |
|---------------------------|----------------------------------------------------------------------------------------------------------------------------------------------------------------------------------------------------------------------------|
| Medicalisation            | <ul style="list-style-type: none"> <li>Medicalising the healthy population</li> <li>Over-medication</li> <li>Over-treatment</li> <li>Giving tablets instead of modifying lifestyles</li> </ul>                             |
| Lifestyle                 | <ul style="list-style-type: none"> <li>Advocacy of lifestyle changes</li> <li>Diet</li> <li>Exercise</li> <li>Smoking</li> <li>Fats &amp; cholesterol</li> </ul>                                                           |
| Responsibility            | <ul style="list-style-type: none"> <li>Taking tablets mean people don't think they need to change their habits</li> <li>GPs should be addressing lifestyle factors</li> </ul>                                              |
| Side-effects of treatment | <ul style="list-style-type: none"> <li>Muscular pain, weakness, myalgia, arthralgia, sleeping, not sleeping, diabetes, etc.</li> <li>Adverse effects</li> <li>Side-effects</li> <li>Negative impacts of statins</li> </ul> |
| Collateral benefits       | <ul style="list-style-type: none"> <li>Statins improving other conditions eg multiple sclerosis</li> </ul>                                                                                                                 |

|    |                           |                                                         |
|----|---------------------------|---------------------------------------------------------|
| 1  |                           |                                                         |
| 2  |                           |                                                         |
| 3  | Evidence/effectiveness of | Statins are in/effective                                |
| 4  |                           |                                                         |
| 5  | treatment                 | Statins work by                                         |
| 6  |                           |                                                         |
| 7  |                           | The evidence shows                                      |
| 8  |                           |                                                         |
| 9  |                           | Statins halve the incidence of                          |
| 10 |                           |                                                         |
| 11 |                           | Studies show statin efficacy                            |
| 12 |                           |                                                         |
| 13 |                           | Effectiveness in primary prevention                     |
| 14 |                           |                                                         |
| 15 |                           | Effectiveness in secondary prevention                   |
| 16 |                           |                                                         |
| 17 |                           |                                                         |
| 18 |                           |                                                         |
| 19 | Confounding factors       | It is not the statin, it is...                          |
| 20 |                           |                                                         |
| 21 |                           | Reducing smoking, not statins, has had an effect...     |
| 22 |                           |                                                         |
| 23 |                           |                                                         |
| 24 | Scientific explanation    | Statins operate by tackling reducing the enzymes that   |
| 25 |                           | encourage production of LD cholesterol...               |
| 26 |                           |                                                         |
| 27 |                           | Anti-inflammatory properties of statins...              |
| 28 |                           |                                                         |
| 29 |                           | Side-effects are caused by the over-production of...    |
| 30 |                           |                                                         |
| 31 |                           |                                                         |
| 32 |                           |                                                         |
| 33 | (Dis)trust                | Doctors are paid by the number of people they           |
| 34 |                           | identify/number of prescriptions...                     |
| 35 |                           |                                                         |
| 36 |                           | Studies are pharmaceutically sponsored...               |
| 37 |                           |                                                         |
| 38 |                           | Government is motivated by...                           |
| 39 |                           |                                                         |
| 40 |                           | NICE has a duty to provide objective guidance...        |
| 41 |                           |                                                         |
| 42 |                           |                                                         |
| 43 |                           |                                                         |
| 44 |                           |                                                         |
| 45 | Costs, value              | Statins only cost 12p per day                           |
| 46 |                           |                                                         |
| 47 |                           | Prescriptions are increasing as statins come off patent |
| 48 |                           |                                                         |
| 49 |                           | The costs of surgery vs. drugs                          |
| 50 |                           |                                                         |
| 51 |                           |                                                         |
| 52 | Personal experience       | My doctor recommended...                                |
| 53 |                           |                                                         |
| 54 |                           | I suffered side-effects from...                         |
| 55 |                           |                                                         |
| 56 |                           | I was on statins for 5 years...                         |
| 57 |                           |                                                         |
| 58 |                           |                                                         |
| 59 |                           | We and our patients know that...                        |
| 60 |                           |                                                         |

1  
2  
3  
4  
5  
6  
7  
8  
9  
10  
11  
12  
13  
14  
15  
16  
17  
18  
19  
20  
21  
22  
23  
24  
25  
26  
27  
28  
29  
30  
31  
32  
33  
34  
35  
36  
37  
38  
39  
40  
41  
42  
43  
44  
45  
46  
47  
48  
49  
50  
51  
52  
53  
54  
55  
56  
57  
58  
59  
60

|                           |                                                                      |
|---------------------------|----------------------------------------------------------------------|
|                           | As a doctor...                                                       |
|                           | As a patient...                                                      |
| Patient/user              | Patients should have a choice                                        |
| choice/autonomy           | Patients should check with their doctor                              |
|                           | Statins are not mandatory                                            |
|                           | No-one is forced to take a statin                                    |
|                           | Patients need to weigh up the pros and cons                          |
| Information for decision- | Information for patients                                             |
| making                    | Patients need to make informed decisions                             |
|                           | Patients are confused by the messages they receive                   |
|                           | It is important to give clear information                            |
| Age, gender               | More men than women/vice versa                                       |
|                           | Everyone over 50/65/75/85                                            |
|                           | Evidence is lower for those over 75                                  |
| Pharmaceutical companies  | Pharma                                                               |
|                           | Sponsorship of trials                                                |
|                           | Sponsorship of individuals                                           |
|                           | Influence on individuals, institutions, national bodies,<br>politics |
| Reader response           | Where quoted – letters, emails, follow up trails                     |
| Trends                    | Over the last ten years...                                           |
| International comparisons | The UK is the statins capital of Europe...                           |
|                           | UK vs. US/Europe/Australasia                                         |

# BMJ Open

## A CONTENT ANALYSIS OF THE REPRESENTATION OF STATINS IN THE BRITISH NEWSPRINT MEDIA

|                                 |                                                                                    |
|---------------------------------|------------------------------------------------------------------------------------|
| Journal:                        | <i>BMJ Open</i>                                                                    |
| Manuscript ID                   | bmjopen-2016-012613.R2                                                             |
| Article Type:                   | Research                                                                           |
| Date Submitted by the Author:   | 18-Jan-2017                                                                        |
| Complete List of Authors:       | Chisnell, Julia; PenCLAHRC, Institute of Health Research                           |
| <b>Primary Subject Heading</b>: | Public health                                                                      |
| Secondary Subject Heading:      | Cardiovascular medicine                                                            |
| Keywords:                       | Statins, Content analysis, Cardiovascular medicine, Medicalisation, Media coverage |
|                                 |                                                                                    |

SCHOLARONE™  
Manuscripts

Peer Review Only

1  
2  
3  
4  
5  
6  
7  
8  
9  
10  
11  
12  
13  
14  
15  
16  
17  
18  
19  
20  
21  
22  
23  
24  
25  
26  
27  
28  
29  
30  
31  
32  
33  
34  
35  
36  
37  
38  
39  
40  
41  
42  
43  
44  
45  
46  
47  
48  
49  
50  
51  
52  
53  
54  
55  
56  
57  
58  
59  
60

# A CONTENT ANALYSIS OF THE REPRESENTATION OF STATINS IN THE BRITISH NEWSPRINT MEDIA

Author: Chisnell, J.

J M Chisnell  
Specialty Registrar in Public Health  
University of Exeter  
Email: [J.M.Chisnell@exeter.ac.uk](mailto:J.M.Chisnell@exeter.ac.uk)  
Tel: 07568-543585

Contact address:

PenCLAHRC, Institute of Health Research  
University of Exeter Medical School  
St Luke's Campus  
Exeter  
EX1 2LU

Keywords: Statins, cardiovascular medicine, content analysis, media coverage, medicalisation

Wordcount excluding title page, abstract, references and tables: 3255

Tables and graphs: 2 tables, 2 graphs

## ABSTRACT

### *Objective*

This study reviewed the news media coverage of statins, seeking to identify specific trends or differences in viewpoint between media outlets and examine common themes.

### *Design*

The study is a content analysis of the frequency and content of the reporting of statins in a selection of the British newsprint media. It involved an assessment of the number, timing and thematic content of articles followed by a discourse analysis examining the underlying narratives. The sample was the output of four UK newspapers, covering a broad-spectrum readership, over a six month timeframe 1 October 2013 - 31 March 2014.

### *Results*

A total of 67 articles included reference to statins. The majority (39, 58%) were reporting or responding to publication of a clinical study. The ratio of negative to positive coverage was greater than 2:1 overall. In the more politically right-leaning newspapers, 67% of coverage was predominantly negative (30/45 articles); 32% in the more left-leaning papers (7/22 articles). Common themes were:

- the perceived 'medicalisation' of the population;



- the balance between lifestyle modification and medical treatments in the primary prevention of heart disease;
- side effects and effectiveness of statins;
- pharmaceutical sponsorship, and implications for the reliability of evidence;
- trust between the public and government, institutions, research organisations and the medical profession.

### **Conclusions**

Newsprint media coverage of statins was substantially influenced by the publication of national guidance and by coverage in the medical journals of clinical studies and comment. Statins received a predominantly negative portrayal, notably in the more right-leaning press. There were shared themes: concern about the balance between medication and lifestyle change in the primary prevention of heart disease; the adverse effects of treatment; and a questioning of the reliability of evidence from research institutions, scientists and clinicians in the light of their potential allegiances and funding.

### **Strengths and limitations of this study**

- The use of media websites for data collection may have excluded some material which was only available in the print versions, and conversely included some material not available in print.

- The pragmatic selection of the study timescale and media selection may have reduced the representativeness and therefore generalisability of the study; however, the sampling strategy was designed to ensure that the sources represented a reasonable range and diversity of the established newspaper media.
- There was a single researcher and not a research team, leading to a potential risk of bias or incompleteness in the identification and selection of articles, and no inter-rater reliability checking of the coding scheme, which may have an impact on the validity of the analyses.
- Blinding was not strictly possible, but articles were coded by a unique numerical identifier to reduce bias during the thematic analysis and an inductive approach was applied to ensure that the themes were dictated by the evidence emerging from the texts and not imposed by the researcher.

## INTRODUCTION

UK clinical guidelines recommend the use of lipid lowering therapy for both secondary and primary prevention.[1, 2] This is based on published clinical trial evidence of effectiveness, cost-effectiveness,[1, 3-8] and the extent of side-effects.[7-9] There is debate in the clinical literature about the merits of the widespread and growing use of statins, questioning whether the 'right' patients are benefiting, whether the threshold for initiation of primary preventative treatment is too low, and the reliability of the evidence underpinning the guidelines.[10-16] The same issues are also covered in the lay media, where, however, the nature and extent of the debate is less well documented.

There is an interaction between the lay and clinical media, with the same commentators and topics or reported, or directly speaking, in both,[17-21] And importantly, there is evidence that the lay media influences health-related perceptions and behaviours, including reporting of side-effects, uptake of services and adherence to medication.[22-27] The Chief Medical Officer for England has called for a review into how the safety and efficacy of drugs is judged, prompted by concern about the representation of statins and other drugs "in both the medical and general press".[28] A recent Danish study, using national and regional media coverage as a proxy for individual exposure, found that negative statin-related news stories were associated with both early statin discontinuation and cardiovascular mortality.[29]

In the light of this relationship, it is relevant to examine the portrayal of statins in the media, and the messages that are being predominantly received. This study

1  
2 investigates the nature of the representation of statins in the newsprint media,  
3  
4 identifying the key themes, trends, characteristics and viewpoints.  
5  
6  
7  
8  
9  
10  
11  
12  
13  
14  
15  
16  
17  
18  
19  
20  
21  
22  
23  
24  
25  
26  
27  
28  
29  
30  
31  
32  
33  
34  
35  
36  
37  
38  
39  
40  
41  
42  
43  
44  
45  
46  
47  
48  
49  
50  
51  
52  
53  
54  
55  
56  
57  
58  
59  
60

For peer review only

## METHOD

A descriptive and thematic analysis of the frequency of the coverage of statins in the UK newsprint media was undertaken. Media were selected with the aim of obtaining broad spectrum coverage reflecting a range of editorial leanings and readerships. An initial screening sample was undertaken in order to pilot the methodology and to consolidate the questions and sampling strategy for the main research.[30] This identified what would be practical for one researcher to collect, and enabled refinement of the range and type of outlets, the time period and the type of articles for inclusion in the main data collection. The sampling frame selected for the main study was the UK newsprint media. A purposive sampling strategy was followed, with newspapers selected on the basis that they were accessible, able to be searched and analysed by one researcher in the time available, and demographically, geographically and politically representative of a broad spectrum readership. The selected newspapers were The Daily Mail, The Daily Mirror, The Telegraph and The Guardian (**Table 1**). These are all national UK newspapers, recording the highest circulation<sup>1</sup>.

---

<sup>1</sup> The Sun recorded the highest circulation but The Sun and The Times were excluded because they did not have free to access websites.

**Table 1 Readership of selected newspapers 2013**[31, 32]

| Category                                  | Daily Mail                    | Daily Mirror | The Telegraph     | The Guardian |
|-------------------------------------------|-------------------------------|--------------|-------------------|--------------|
| Circulation                               | 1,863,000                     | 1,058,500    | 555,600           | 204,400      |
| Average age                               | 58                            | Not given    | 61                | 44           |
| Readership 65+                            | 45%                           | 34%          | 46%               | 21%          |
| Gender                                    | 51% female                    | 54% male     | 52% male          | 52% male     |
| Social class ABC1 <sup>2</sup>            | 64%                           | 43%          | 87%               | 89%          |
| Predominant geography [Mori 2005]         | 83% outside London & Scotland | North        | East & South East | London       |
| Predominant political stance <sup>3</sup> | Right                         | Left         | Centre right      | Centre left  |
| Market designation                        | Tabloid                       | Tabloid      | Broadsheet        | Broadsheet   |

Full texts of articles were searched by keyword and collected retrospectively from the websites of the selected media outlets over a continuous six month timeframe (1 October 2013 to 31 March 2014). The main search term was “statin” (“statins” did not retrieve all mentions.) A further search on “cholesterol”, “cardiovascular” and “heart disease” was undertaken to confirm all relevant articles had been captured. All articles with any recorded mention of statins were screened. All types of article were included.

Articles were downloaded and printed in full. Each article was given a unique reference number, to blind the researcher to source during the analysis, and key descriptors were recorded. A thematic data analysis was then undertaken. A coding scheme provided a consistent framework for data collection and analysis

<sup>2</sup> Social gradings A-E are based on 2011 UK census data. ABC1 represents higher & intermediate to clerical and junior occupations.

<sup>3</sup> Political stance reflects party affiliation in the most recent general election. (Right: Conservative, UKIP; left: Labour, Green; Centre right: Conservative, Liberal Democrat; Centre left: Labour, Liberal Democrat.)

1  
2 and enabled independent third party review. The exclusion criterion was  
3  
4 peripheral mention of statins with no associated reporting or comment.  
5  
6

7  
8  
9 The analysis was in two parts. An initial descriptive analysis mapped the findings  
10  
11 against the descriptive indicators, including whether the coverage was judged to  
12  
13 be predominantly positive or negative in terms of the arguments, language, and  
14  
15 terminology. Where the proportion of positive and negative comments appeared  
16  
17 similar, or where it was difficult to decide on the overall direction, a neutral  
18  
19 assessment was given. A more detailed qualitative analysis then examined the  
20  
21 nature of the discourses within the key themes, including viewpoints, assumptions  
22  
23 and language. Outlets were then tracked back and identified in the results. A  
24  
25 copy of the coding scheme is available as a supplementary document.  
26  
27

28  
29  
30  
31 There were no confidentiality issues associated with the study as all data sources  
32  
33 were within the public domain. Ethics Committee approval was not required.  
34  
35  
36  
37  
38  
39  
40  
41  
42  
43  
44  
45  
46  
47  
48  
49  
50  
51  
52  
53  
54  
55  
56  
57  
58  
59  
60

## RESULTS

Searches identified 67 articles during the time period. A timeline showing coverage by outlet by week is shown in **Figure 1**. There is considerable variation, with peaks in coverage weeks commencing 11 February and 18 March. The NICE revised draft guidelines were published on 12 February,[33] covered in 11 articles, prompting the earlier peak. A systematic review of the side-effects of statins[9] was widely reported a month later. In only five of the 26 weeks was there no story about statins.

**Figure 1 Coverage by outlet by week, October 2013 – March 2014**

In two thirds of articles (**Table 2**), statins were the main topic. The majority of articles (39, 58%) were reporting or responding to publication of a clinical study.



**Table 2** Number, stance, and theme of articles mentioning statins  
1 October 2013 – 31 March 2014

|                                  |                                | Telegraph | Daily Mail | Guardian | Daily Mirror | Total    |
|----------------------------------|--------------------------------|-----------|------------|----------|--------------|----------|
| <b>Number of articles</b>        |                                | 25        | 20         | 11       | 11*          | 67       |
| <b>Frequency of article type</b> | Study report/ response         | 10 (40%)  | 13 (65%)   | 6 (55%)  | 10 (91%)     | 39 (58%) |
|                                  | Commentary                     | 3 (12%)   | 1 (5%)     | 2 (18%)  | 0 (0%)       | 6 (9%)   |
|                                  | Q&A                            | 2 (8%)    | 1 (5%)     | 0 (0%)   | 0 (0%)       | 3 (4%)   |
|                                  | Personal story                 | 1 (4%)    | 1 (5%)     | 1 (9%)   | 0 (0%)       | 3 (4%)   |
|                                  | News report                    | 1** (4%)  | 1** (5%)   | 0 (0%)   | 1** (8%)     | 3 (4%)   |
|                                  | Letters                        | 4 (16%)   | 0 (0%)     | 0 (0%)   | 0 (0%)       | 4 (6%)   |
|                                  | Expert/'celebrity' commentator | 3 (12%)   | 2 (10%)    | 0 (0%)   | 0 (8%)       | 5 (7%)   |
|                                  | Other                          | 1 (4%)    | 1 (5%)     | 2 (18%)  | 0 (0%)       | 4 (6%)   |
| <b>Statins main topic</b>        | Main topic                     | 18 (72%)  | 14 (70%)   | 10 (91%) | 3 (25%)      | 45 (67%) |
|                                  | Secondary topic                | 7 (28%)   | 6 (30%)    | 1 (9%)   | 8 (67%)      | 22 (33%) |

\* One article was excluded.

\*\* Publication of NICE and US guidelines on the use of statins

The ratio of negative to positive coverage was greater than 2:1 overall. The more right-leaning papers exhibited a ratio of 3:1 negative to positive articles, where the left leaning press had equal proportions of each. The Telegraph had the highest differential with a 10:1 ratio of negative to positive stories (**Figure 2**). Articles on studies reporting collateral benefits (statins benefiting people with multiple sclerosis or dementia for example) were more likely to portray statins in a positive light.

#### Figure 2 Positive and negative coverage<sup>4</sup>

<sup>4</sup> The Guardian and Telegraph are categorised as broadsheet, The Mail and Mirror as tabloid; The Telegraph and Mail are categorised as right leaning, The Guardian and Mirror as left leaning.

## Thematic analysis

The themes with the highest number of mentions selected for detailed analysis were: medicalisation versus lifestyle modification; the effectiveness of statins in the light of their side-effects; and trust of those advocating statin therapy.

### *Medicalisation versus lifestyle modification*

The term “medicalisation” is used by three of the four sampled media, both in quotes from contributors and by the article authors. In most cases it is used to denote the introduction of drug treatment for use in an otherwise apparently healthy population. It is used with an exclusively negative meaning:

*“the “medicalisation” of people who are not ill... turning five million middle-aged and predominantly healthy men and women into statin-popping patients.”* [Mail, 13/2/14]

*“It is a concern to have to mass medicalise the whole of the British public in this way”* [Telegraph, 11/2/14] Britain will be confirmed *“the statins capital of Europe”* [Mail, 12/2/14]

There is a language of passivity and control. People are “medicalised”, “medicated” or “*put on statins*” (emphasis added).

1  
2  
3  
4 The majority of articles appear supportive of prescribing statins for those with  
5 established heart disease. The controversy centres on what proportion of those  
6 with risk factors for cardiovascular disease should receive statins as a primary  
7 preventative measure:  
8  
9  
10  
11  
12

13  
14  
15  
16 *“there are people who may be overweight or have raised blood pressure.*  
17 *They probably don’t have symptoms. They are not ill”* [Guardian, 21/3/14]  
18  
19

20  
21  
22 *“we’ll be medicalising many relatively healthy patients”* [Mail, 12/2/14]  
23  
24 (emphasis added)  
25  
26  
27

28  
29 The medical profession is seen to be focusing on the medical option in preference  
30 to promoting lifestyle change:  
31  
32  
33  
34

35  
36 *“[It is] “simpler to reach for the pad and write out a prescription” than to dole*  
37 *out lifestyle advice”* [National Obesity Forum quoted in Mail and Telegraph,  
38 25/12/13]  
39  
40  
41  
42

43  
44 The public is also indicated to be at fault:  
45  
46  
47  
48

49 *“There is a tendency... for patients (and doctors) to think that as long as*  
50 *they’re on statins, smoking or a poor diet doesn’t really matter”;*  
51 *“people will see them as a magic pill that allows them to tuck into three*  
52 *pizzas a night and umpteen hamburgers with impunity”* [“leading  
53  
54  
55  
56  
57  
58  
59  
60

1  
2 cardiologist" quoted in Mail, 8/3/14, 13/2/14]

3  
4  
5  
6  
7 Lifestyle measures could actually be the preferable medicine:

8  
9  
10  
11 *"Exercise can be just as efficient as drugs in treating heart disease"* [study  
12 report, Mirror, 2/10/13]

13  
14  
15  
16  
17  
18 *"eating an apple a day is as effective as taking statins"* [medical  
19 "campaigner", Telegraph, 2/3/14]

### 20 21 22 23 24 25 26 27 28 **Effectiveness and side-effects of treatment**

29  
30  
31  
32  
33 The positioning of "expert" opinion is important here. Who is most qualified to  
34 determine the impact of side-effects: clinician, trialist or patient?

35  
36  
37  
38  
39  
40 Evidence from published studies on the extent of side-effects is reported:

41  
42  
43  
44  
45 *"the benefits of statins greatly exceed any side effects"* [Cholesterol trialists  
46 study report, Mail, 12/2/14].

47  
48  
49  
50  
51 This is directly challenged by individuals:

52  
53  
54  
55  
56 *NICE "will tell you that... one in 10,000 patients... will suffer severe muscular*

1  
2  
3 *pain.... In contrast, reliable data from the real world... backed up by*  
4 *anecdotal evidence from my experience as a cardiac physician, suggests*  
5 *that the real figure... is closer to one in five.* [cardiologist quoted in Mail,  
6  
7  
8  
9 13/2/14]

10  
11  
12  
13  
14 *"I know of only three people who have been on statins – I am one of them –*  
15 *and we all experienced debilitating muscle aches"* [reader correspondence,  
16  
17  
18  
19  
20  
21  
22  
23  
24  
25  
26  
27  
28  
29  
30  
31  
32  
33  
34  
35  
36  
37  
38  
39  
40  
41  
42  
43  
44  
45  
46  
47  
48  
49  
50  
51  
52  
53  
54  
55  
56  
57  
58  
59  
60  
Telegraph, 15/3/14]

The "noise" about side-effects may produce the equivalent of a "nocebo effect":

26  
27 *"If we tell people about side effects,... we induce these unpleasant*  
28 *symptoms,... inflicting harm on our patients"; "We... shouldn't scare people*  
29 *into experiencing side effects... or into avoiding a medication which might*  
30 *help them"* ["study author", Guardian, 14/3/14]

Statins are portrayed as either villain or hero:

42  
43 *"in years to come, statins could be seen as being as dangerous as*  
44 *thalidomide"* [reader correspondence, Mail, 14/11/13]

49  
50 *"Statins may reduce dementia by a third"* [study report, Telegraph, 30/12/13]

54  
55  
56  
57  
58  
59  
60  
Over the six month sample period, statins were associated with potential  
beneficial effects on dementia, multiple sclerosis and erectile dysfunction.

## Trust

A related but distinct theme is trust. The reliability of studies or guidelines is traditionally linked to the weight of scientific evidence – usually RCT evidence – underpinning them. However there is an implied suspicion of the evidence based on the perceived trustworthiness of those producing or funding it. An interesting question emerges concerning which forms of evidence have the greater validity:

NICE recommendations for lowering the threshold for statin treatment are:

*“based on solid evidence and the public should trust them”* [US study authors quoted in Mail, 13/11/13]

*“The drug companies were saying this drug was the best thing since sliced bread”; “their findings are contradicted by independent surveys”* and they are *“contrary to the experience of many Telegraph readers”* [response to draft NICE guidelines, Telegraph, 2/3/14]

*“trials run by the drug companies... are likely to be excessively favourable”* [Harvard clinician, Mail, 24/12/13]

these same trials are refuted by *“anecdotal accounts... real world data... [and] my experience as a cardiac physician”* [cardiologist, Mail, 13/2/14]

The confidentiality of some of the trial data leads to suspicion of what the data

1  
2  
3 contain:  
4  
5  
6

7 There is no reason *“to accept the analysis of the Oxford team who have*  
8 *seen the data at face value just because they are big and important and*  
9 *professors at Oxford University... . Either they don’t have a vast chunk of*  
10 *data or they do and they are not publishing it”* [“Scottish GP and author”,  
11  
12  
13  
14  
15  
16 Guardian, 21/3/14]  
17

18  
19  
20 Another dimension of trust is seen in the portrayal of organisations and  
21  
22 institutions. Pharmaceutical companies are almost universally negatively  
23  
24 portrayed. Some academic bodies are still largely to be trusted, for example *“the*  
25 *respected Cochrane group”* [Guardian], but other organisations or individuals are  
26  
27 contaminated by association:  
28  
29  
30  
31  
32

33 there are *“arrangements between Big Pharma and academic institutions*  
34 *[and] vested interests in the research”* [Telegraph, 15/3/14]  
35  
36  
37  
38  
39

40 Political and administrative organisations receive a mixed portrayal:  
41  
42  
43

44 *“the government’s advice is based on a wealth of evidence. The BMJ article*  
45 *is based on opinion”* [Public Health England director quoted in Guardian,  
46  
47  
48  
49  
50  
51  
52  
53  
54  
55  
56  
57  
58  
59  
60  
23/10/13]

53 *“how can we explain this big gap between... personal experience... of*  
54 *doctors and patients... and official bodies such as NICE?”* [Mail, 18/3/14]  
55  
56  
57  
58  
59  
60

1  
2  
3  
4  
5        “NICE seems to be siding firmly with the drug companies and relying on  
6  
7        *industry-sponsored statistics*” [Mail, 13/2/14]  
8  
9

10  
11        Family doctors receive consistently negative coverage. Medical authority is  
12  
13        portrayed as siding with, or indirectly influenced by, the pharmaceutically  
14  
15        sponsored institutions. Doctors are accused of “*inexcusable deviousness*” in their  
16  
17        methods for fulfilling screening quotas and in disguising a prescription for statins  
18  
19        as “*lipid tablets*” [Telegraph, 16/2/14]. There is a risk of:  
20  
21

22  
23  
24        “*more aggressive prescribing of the [statin] medications by family doctors,*  
25  
26        *whose pay is linked to take-up of the pills among their patients*” [Telegraph,  
27  
28        11/2/14].  
29  
30  
31  
32  
33  
34  
35  
36  
37  
38  
39  
40  
41  
42  
43  
44  
45  
46  
47  
48  
49  
50  
51  
52  
53  
54  
55  
56  
57  
58  
59  
60



## DISCUSSION

This study found that the newsprint media coverage of statins was substantially influenced by coverage in the medical journals of clinical studies, reports and comment. Statins received a predominantly negative portrayal overall, notably in the more right-leaning press. Specifically, there was considerable coverage of reported side-effects, concern about the balance between medication and lifestyle changes in primary prevention, and a questioning of the reliability of evidence from research institutions, scientists and clinicians in the light of their potential allegiances and funding.

The findings are consistent with some other studies and also highlight some departures from previous research.

- The strongest criticism of statins and their effects in the media appears to reflect very closely the arguments presented in the medical journals over the same time period, although the weighting of the arguments may differ.[10-12] In the popular press there is no discernible difference in the reporting of what the scientific community might describe as important, high quality studies compared with the reporting of small studies, or opinion, with high potential for bias. All views are portrayed with equal weight and seriousness. Other studies have identified greater selectivity in reporting in the popular compared with the specialist media, with a greater focus on more controversial topics.[34]
- A notable trend I identified in the media is for reports of new links between, for example, statins and dementia, or statins and impotence, to be more

1  
2 uncritical than reports of the use of statins in preventing heart disease. With  
3  
4 a new study, the results themselves are the story, whereas with the role of  
5  
6 statins in the prevention of heart disease, it is the debate and controversy  
7  
8 that is represented.  
9

- 10  
11 • In terms of the medication versus lifestyle debate, clinical studies disagree  
12  
13 about the extent to which health promoting behaviours are actually affected  
14  
15 by long term statin use.[35-37] However the newspaper coverage contained  
16  
17 a largely judgmental vocabulary around the selection of a medical treatment  
18  
19 pathway, suggesting that people who take tablets, or doctors who prescribe  
20  
21 them, may be abdicating personal responsibility for health.  
22  
23
- 24 • The question of trust in institutions has also been highlighted in other  
25  
26 research. Commentators have identified a similar tendency in the media to  
27  
28 exaggerate and seek to mobilise opinion against a “supposed threat” or  
29  
30 conspiracy.[38] In contrast, where previous research has placed clinicians -  
31  
32 family doctors in particular - high in the hierarchy of public trust,[22, 39] this  
33  
34 study found no evidence of positive reporting of the medical profession in  
35  
36 relation to statins.  
37  
38  
39  
40  
41

42 One question arising from this study is whether statins have a distinct status with  
43  
44 respect to the debate. The polarisation of good drug/bad drug is not new. Other  
45  
46 studies have reported a similarly dichotomised approach in relation to other  
47  
48 medical treatments.[40, 23] There are parallels with the representation of the  
49  
50 diagnosis and treatment of hypertension, another frequently invisible “sickness”  
51  
52 addressed by long term, preventative medication.[16] However in the case of  
53  
54 statins, the threshold for treatment appears increasingly to be driven by age rather  
55  
56  
57  
58  
59  
60

1  
2 than specific clinical indicators. (The QRisk cardiovascular risk calculator is  
3  
4 strongly influenced by age.) Everyone could eventually become a candidate for  
5  
6 medicalisation, however healthy their lifestyle and however low their cholesterol  
7  
8 ratio.  
9

10  
11  
12  
13 The study highlights a fundamental point concerning the significance of the  
14  
15 portrayal of medical issues in the media: is it important that even someone  
16  
17 reading across the whole range of newspaper coverage sampled for this study  
18  
19 would receive a negative impression of the value of the scientific evidence, and  
20  
21 the benefit of statins, when current clinical guidance recommends their use?  
22  
23 Coverage in the popular press highlights the confusing messages projected by  
24  
25 science and research worldwide. There is no mediating discourse leading people  
26  
27 through the pendulum findings of one study or learned commentator after another.  
28  
29 The “noise” of the continuing debate may even be frightening people away from  
30  
31 taking their prescribed medications, and increasing cardiovascular mortality.[17,  
32  
33 29] This raises an ethical question around the desirability of presenting all  
34  
35 viewpoints, however well or ill-evidenced, at the risk of deterring people from  
36  
37 acting responsibly with regard to their health. Other studies have suggested there  
38  
39 is scope for the scientific and medical worlds to articulate their messages more  
40  
41 carefully for popular media consumption.[40, 41, 27] Alternatively, the rawness  
42  
43 and transparency of the debate may be a good thing. The ability to see and  
44  
45 critique another scientist’s work is valued by researchers, and it may also be of  
46  
47 benefit to a non-medical audience to hear the challenge and defence of each  
48  
49 viewpoint played out in the public arena. One response is for subject experts to  
50  
51 provide an evidence-based commentary on scientific issues of public interest,  
52  
53  
54  
55  
56  
57  
58  
59  
60

1  
2  
3 along the lines of NHS Choices' "Behind the Headlines", developed by Sir Muir  
4 Gray because "In the same way that people need clean, clear water, they have a  
5 right to clean, clear knowledge".[42]  
6  
7  
8  
9

10  
11 This study adds insight into the portrayal of preventative medications, and related  
12 clinical policy, in the media. There are potential implications for clinicians, study  
13 authors, policy makers and public health practitioners. By increasing awareness  
14 of the messages their patients, readers and the public are predominantly hearing  
15 in relation to their medications, it highlights the considerable scope for all health  
16 experts to promote a more media-friendly, evidence-based narrative on health  
17 topics of public interest or concern.  
18  
19  
20  
21  
22  
23  
24  
25  
26  
27  
28

29 Recommendations for further research include a comparison of a wider number of  
30 outlets and different areas of medicine over a longer period of time, a comparison  
31 of the medical and popular media coverage in detail, and further exploration of the  
32 impact of media coverage on reader health behaviours.  
33  
34  
35  
36  
37  
38  
39  
40  
41  
42  
43  
44  
45  
46

47 **Contributorship statement:** no contributing authors.

48 **Declaration of competing interests:** none.

49 **Funding:** none received.

50 **Data sharing statement:** no supplementary unpublished data

51 **Ethical approval:** not required.  
52  
53  
54  
55  
56  
57  
58  
59  
60

1  
2  
3  
4  
5  
6  
7  
8  
9  
10  
11  
12  
13  
14  
15  
16  
17  
18  
19  
20  
21  
22  
23  
24  
25  
26  
27  
28  
29  
30  
31  
32  
33  
34  
35  
36  
37  
38  
39  
40  
41  
42  
43  
44  
45  
46  
47  
48  
49  
50  
51  
52  
53  
54  
55  
56  
57  
58  
59  
60

**Transparency declaration:** The manuscript is an honest, accurate and transparent account of the study reported. No important aspects have been omitted.

For peer review only

## REFERENCES

1 National Institute for Health and Care Excellence. Lipid modification: cardiovascular risk assessment and the modification of blood lipids for the primary and secondary prevention of cardiovascular disease. NICE clinical guideline 181 2014.

2 Joint British Societies. Prepared by: British Cardiac Society, British Hypertension Society, Diabetes UK, HEART UK, Primary Care Cardiovascular Society, The Stroke Association. JBS 2: Joint British Societies' guidelines on prevention of cardiovascular disease in clinical practice. *Heart* 2005;91:suppl5v1-v52 doi:10.1136/hrt.2005.079988.

3 Baigent C, Blackwell L, Emberson J, et al. Cholesterol Treatment Trialists' (CCT) Collaboration. Efficacy and safety of more intensive lowering of LDL cholesterol: A meta-analysis of data from 170 000 participants in 26 randomised trials. *Lancet* 2010;376(9753):1670-1681.29.

4 Baigent C, Keech A, Kearney P, et al. Cholesterol Treatment Trialists' (CTT) Collaboration. Efficacy and safety of cholesterol-lowering treatment: prospective meta-analysis of data from 90,056 participants in 14 randomised trials of statins. *Lancet* 2005;366(9493):1267-1278.33.

5 National Institute for Health and Care Excellence. Lipid modification: cardiovascular risk assessment and the modification of blood lipids for the primary and secondary prevention of cardiovascular disease, *NICE clinical guideline 181*, 2014.

6 National Institute for Health and Care Excellence Guideline Development Group. Lipid modification: cardiovascular risk assessment and the modification of blood lipids for the primary and secondary prevention of cardiovascular disease, *NICE Clinical guideline, methods, evidence and recommendations*, draft for consultation 2014.

7 Taylor F, Huffman M, Macedo A, et al. Statins for the primary prevention of cardiovascular disease. *Cochrane Database of Systematic Reviews* 2013; Issue 1. Art.No.:CD004816. DOI:10.1002/14651858.CD004816.pub5.

8 Mihaylova B, Voysey M, Fray A, et al. Cholesterol Treatment Trialists' (CTT) Collaboration. The effects of lowering LDL cholesterol with statin therapy in people at low risk of vascular disease: Meta-analysis of individual data from 27 randomised trials. *Lancet* 2012;380(9841):581-590.

9 Finegold J, Manisty C, Goldacre B, et al. What proportion of symptomatic side effects in patients taking statins are genuinely caused by the drug? Systematic review of randomized placebo-controlled trials to aid individual patient choice, DOI: 10.1177/2047487314525531 published online 12 March 2014. *European*

1  
2  
3 *Journal of Preventive Cardiology* 2014.

4  
5 10 Abramson J, Rosenberg H, Jewell N, et al. Should people at low risk of  
6 cardiovascular disease take a statin? *British Medical Journal* 2013;347:f6123.

7  
8 11 Malhotra, A. Saturated fat is not the issue, *British Medical Journal*  
9 2013;347:f6340.

10  
11 12 Godlee, F. (2014) The BMJ and authors withdraw statements suggesting that  
12 adverse events occur in 18-20% of patients, *British Medical Journal*,  
13 2014;348:g3306.

14  
15 13 Zhang H, Plutzky J, Skentzos S, et al. Discontinuation of Statins in Routine  
16 Care Settings: A Cohort Study. *Annals of Internal Medicine* 2013;158:526-534.  
17 doi:10.7326/0003-4819-158-7-201304020-00004.

18  
19 14 van Staa T, Smeeth L, Ng E, et al. The efficiency of cardiovascular risk  
20 assessment: do the right patients get statin treatment? *Heart* 2013;99:1597-1602.

21  
22 15 Wu J, Zhu S, Yao G, et al. Patient Factors Influencing the Prescribing of Lipid  
23 Lowering Drugs for Primary Prevention of Cardiovascular Disease in UK General  
24 Practice: A National Retrospective Cohort *PloSone* 2013;8.7:e67611.

25  
26 16 Rose G. *Rose's Strategy of Preventive Medicine* 2008;Oxford University Press.

27  
28 17 Goldacre B. Statins are a mess: we need better data, and shared decision  
29 making, Editorial. *BMJ* 2014;348:g3306.

30  
31 18 Goldacre B. Statins have no side effects? This is what our study really found.  
32 *The Guardian*. 14 March 2014.

33  
34 19 Goldacre B. *BadScience.net*, 13 March 2014;  
35 [http://www.badscience.net/2014/03/statins-have-no-side-effects-what-our-study-  
36 really-found-its-fixable-flaws-and-why-trials-transparency-matters-again/](http://www.badscience.net/2014/03/statins-have-no-side-effects-what-our-study-really-found-its-fixable-flaws-and-why-trials-transparency-matters-again/)  
37 (Accessed July 2014)

38  
39 20 Malhotra A. Saturated fat is not the issue, *BMJ* 2013;347:f6340.

40  
41 21 Malhotra A. (2013) *BBC News*. 23 October 2013;  
42 <http://www.bbc.co.uk/news/health-24625808> (Accessed June 2016)

43  
44 22 Duffy B, Rowden L. *You are what you read? How newspaper readership is  
45 related to views*. Mori Social Research Institute 2005:P32.

46  
47 23 Seale C. Health and media: an overview. *Sociology of health & illness* 2003;25  
48 (6):513-531.

49  
50 24 van Hunsel F, van Puijenbroek E, deJong-van den Berg L, et al. Media  
51 attention and the influence on the reporting odds ratio in disproportionality

1  
2 analysis: an example of patient reporting of statins, *Pharmacoepidemiol Drug Saf*  
3 2010;19(1):26-32. Doi:10.1002/pds.1865.  
4

5  
6 25 Eberth J, Kline N, Moskowitz D, Montealegre J, Scheurer M. The Role of  
7 Media and the Internet on Vaccine Adverse Event Reporting: A Case Study of  
8 Human Papillomavirus Vaccination, *Journal of Adolescent Health*  
9 2013;Volume54;Issue 3;289 – 295.  
10

11  
12 26 Fasse K, Gamble G, Cundy T, et al. Impact of television coverage on the  
13 number and type of symptoms reported during a health scare: a retrospective pre-  
14 post observational study. *British Medical Journal* 2012;2:e001607  
15 doi:10.1136/bmjopen-2012-001607.  
16

17  
18 27 Grilli R, Ramsay C, Minozzi S. Mass media interventions: effects on health  
19 services utilisation. *Cochrane Database Syst Rev* 2002;Issue1(1).  
20

21  
22 28 Davies S. Letter to the Academy of Medical Sciences, February 2015. Quoted  
23 in The Guardian 16 June 2015.

24 [http://www.theguardian.com/society/2015/jun/16/chief-medical-officer-calls-](http://www.theguardian.com/society/2015/jun/16/chief-medical-officer-calls-review-after-statins-tamiflu-storm)  
25 [review-after-statins-tamiflu-storm](http://www.theguardian.com/society/2015/jun/16/chief-medical-officer-calls-review-after-statins-tamiflu-storm) (Accessed August 2015)

26 Quoted in the Pharmaceutical Journal of the Royal Pharmaceutical Society 17  
27 June 2015. [http://www.pharmaceutical-journal.com/news-and-](http://www.pharmaceutical-journal.com/news-and-analysis/news/englands-top-doctor-orders-review-into-how-medicines-are-evaluated/20068759.article)  
28 [analysis/news/englands-top-doctor-orders-review-into-how-medicines-are-](http://www.pharmaceutical-journal.com/news-and-analysis/news/englands-top-doctor-orders-review-into-how-medicines-are-evaluated/20068759.article)  
29 [evaluated/20068759.article](http://www.pharmaceutical-journal.com/news-and-analysis/news/englands-top-doctor-orders-review-into-how-medicines-are-evaluated/20068759.article) (Accessed August 2015)  
30

31  
32 29 Nielsen S, Nordestgaard B. Negative statin-related news stories decrease  
33 statin persistence and increase myocardial infarction and cardiovascular mortality:  
34 a nationwide prospective cohort study, *European Heart Journal*  
35 2015;doi:10.1093/eurheartj/ehv641.  
36

37  
38 30 Macnamara J. Media content analysis: Its uses, benefits and best practice  
39 methodology. *Asia Pacific Public Relations Journal* 2005;6(1),1-34:P20.  
40

41  
42 31 NRS Readership Estimates, National Readership Survey 2013.

43 <http://www.nrs.co.uk/latest-results/nrs-print-results/newspapers-nrsprintresults/>  
44 (Accessed March 2014)  
45

46  
47 32 TheMediaBriefing 2014. <https://www.themediabriefing.com/> [Accessed March  
48 2014]  
49

50  
51 33 National Institute for Health and Care Excellence Lipid modification:  
52 cardiovascular risk assessment and the modification of blood lipids for the primary  
53 and secondary prevention of cardiovascular disease, draft update for consultation,  
54 NICE guideline 2014.  
55

56  
57 34 Hernandez J, Mantel-Teeuwisse A, van Thiel G, et al. Publication trends in  
58 newspapers and scientific journals for SSRIs and suicidality: a systematic  
59 longitudinal study, *British Medical Journal* 2011;Dec 6;1(2):e000290. doi:  
60 10.1136/bmjopen-2011-000290.



1  
2  
3 35 Sugiyama T, Tsugawa Y, Tseng C, et al. Different Time Trends of Caloric and  
4 Fat Intake Between Statin Users and Nonusers Among US Adults. *Gluttony in the*  
5 *Time of Statins? JAMA Internal Medicine*  
6 2014;doi:10.1001/jamainternmed.2014.1927.  
7

8  
9 36 Lofgren I, Greene G, Schembre S, et al. Comparison of diet quality, physical  
10 activity and biochemical values of older adults either reporting or not reporting use  
11 of lipid-lowering medication. *Journal Nutritional Health Aging* 2010;14(2):168-172.  
12

13 37 Lytsy P, Burell G, Westerling R. Cardiovascular risk factor assessments and  
14 health behaviours in patients using statins compared to a non-treated population.  
15 *Int Journal Behav Med* 2012;19(2):134-142.  
16

17 38 McQuail D. The influence and effects of mass media. *Mass communication*  
18 *and society* 1977;70-94:P15.  
19

20 39 Gale N, Greenfield S, Gill P, et al. Patient and general practitioner attitudes to  
21 taking medication to prevent cardiovascular disease after receiving detailed  
22 information on risks and benefits of treatment: a qualitative study *BMC Family*  
23 *Practice* 2011;12:59doi:10.1186/1471-2296-12-59:P5.  
24  
25

26 40 Prosser H. Marvellous medicines and dangerous drugs: the representation of  
27 prescription medicine in the UK newsprint media. *Public Understanding of*  
28 *Science* 2010;19(1):52-69.  
29

30 41 Danovaro-Holliday M, Wood A, LeBaron C. Rotavirus vaccine and the news  
31 media, 1987-2001, *JAMA: the Journal of the American Medical Association*  
32 2002;Mar20;287(11):1455-62.  
33  
34

35 42 Gray M. *Behind the headlines, NHS Choices* 2011;  
36 <http://www.nhs.uk/news/Pages/about-behind-the-headlines.aspx> (Accessed July  
37 2014)  
38  
39  
40  
41  
42  
43  
44  
45  
46  
47  
48  
49  
50  
51  
52  
53  
54  
55  
56  
57  
58  
59  
60

1  
2  
3  
4  
5  
6  
7  
8  
9  
10  
11  
12  
13  
14  
15  
16  
17  
18  
19  
20  
21  
22  
23  
24  
25  
26  
27  
28  
29  
30  
31  
32  
33  
34  
35  
36  
37  
38  
39  
40  
41  
42  
43  
44  
45  
46  
47  
48  
49  
50  
51  
52  
53  
54  
55  
56  
57  
58  
59  
60

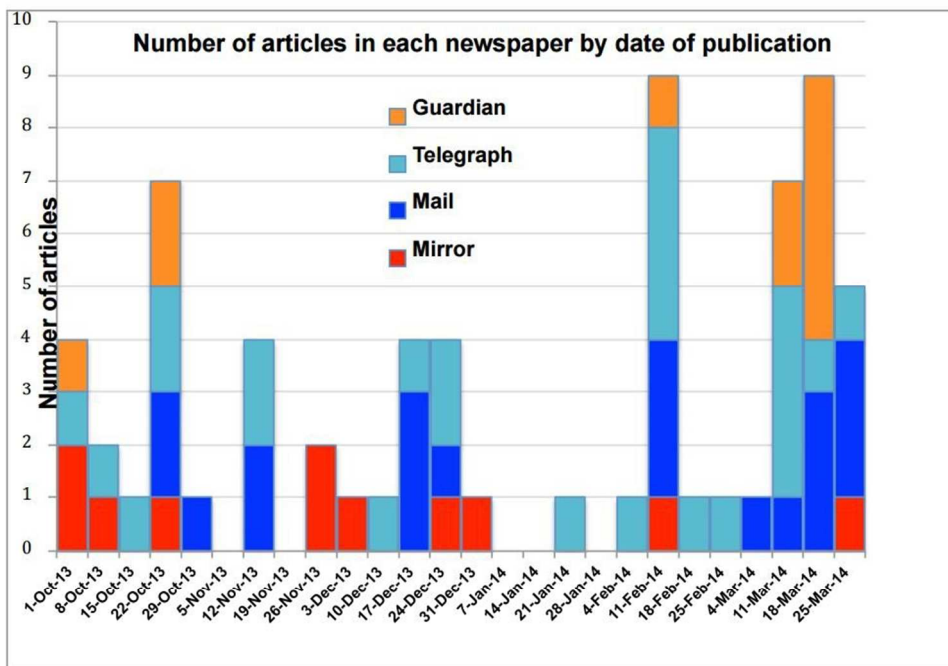

Figure 1

86x61mm (300 x 300 DPI)

ew only

1  
2  
3  
4  
5  
6  
7  
8  
9  
10  
11  
12  
13  
14  
15  
16  
17  
18  
19  
20  
21  
22  
23  
24  
25  
26  
27  
28  
29  
30  
31  
32  
33  
34  
35  
36  
37  
38  
39  
40  
41  
42  
43  
44  
45  
46  
47  
48  
49  
50  
51  
52  
53  
54  
55  
56  
57  
58  
59  
60

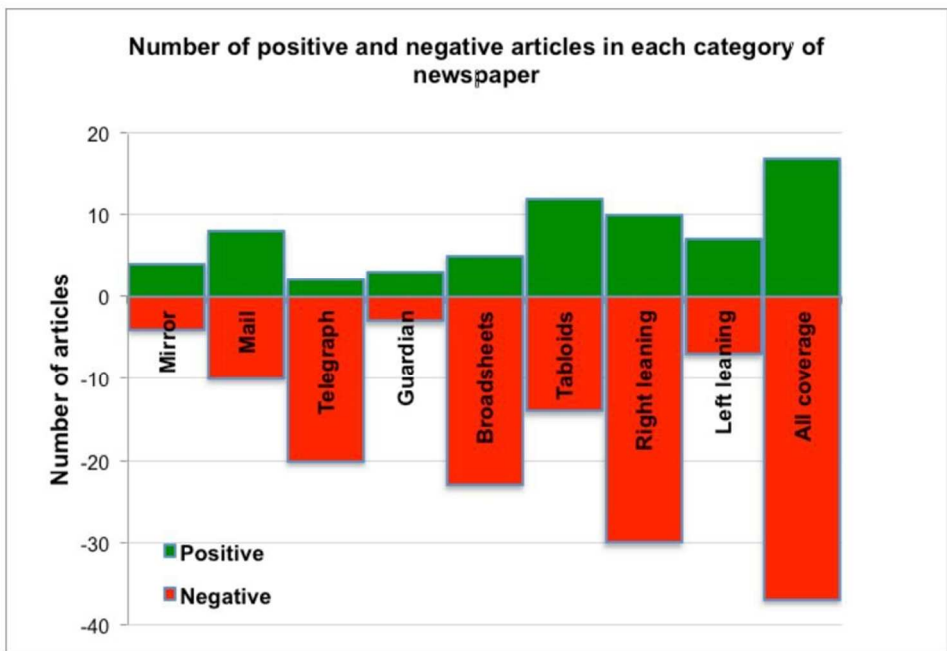

Figure 2

87x59mm (300 x 300 DPI)

view only

## DESCRIPTIVE AND ANALYTICAL CODING SCHEME

### General descriptors

- unique article reference number
- date
- publication/outlet
- type of article
  - news report
  - report of published/planned study
  - personal interest story
  - comment
  - dear doctor column/Q&A
  - other (specify)
- headline (write in full)
- sub-headline (write in full)
- reference to statins
  - main subject
  - secondary subject (eg. in article on heart disease or lifestyle measures)
  - passing comment
- pictures/images – brief description eg. older woman in hospital bed wearing gown & taking blue tablets from a cup; red tablets scattered on a blue background
- author

- 1  
2  
3  
4  
5  
6  
7  
8  
9  
10  
11  
12  
13  
14  
15  
16  
17  
18  
19  
20  
21  
22  
23  
24  
25  
26  
27  
28  
29  
30  
31  
32  
33  
34  
35  
36  
37  
38  
39  
40  
41  
42  
43  
44  
45  
46  
47  
48  
49  
50  
51  
52  
53  
54  
55  
56  
57  
58  
59  
60
- name
  - title (eg. Chief health correspondent; doctor; 'celebrity' columnist)
  - contributors/sources quoted
    - name
    - organisation/designation (eg. British Heart Foundation; King's College London; NICE; BMJ editor; lay commentator)
      - medical 'experts'
      - study authors
      - lay/public individuals or bodies
      - charities/support groups
  - treatment of statins overall
    - positive
    - negative
    - neutral
    - not categorisable
  - examples of positive/negative language
    - mention of harms, risks, side-effects
    - mention of benefits, positive collateral impact
      - eg. 'few argue over effectiveness of statins for secondary prevention'; 'statins help reduce signs of dementia by almost a third'
      - 'significant risk of side-effects'; 'never prescribe a statin for a loved one'
  - apparent purpose of the article
    - eg. reporting publication of new guidance
    - responding to publication of a new study

- reporting patient experience
- responding to reader letter
- reporting prominent medical debate in the BMJ/Lancet

### Constructed themes and suggested indicators

| Theme                     | Example constructs                                                                                                                                                                                                         |
|---------------------------|----------------------------------------------------------------------------------------------------------------------------------------------------------------------------------------------------------------------------|
| Medicalisation            | <ul style="list-style-type: none"> <li>Medicalising the healthy population</li> <li>Over-medication</li> <li>Over-treatment</li> <li>Giving tablets instead of modifying lifestyles</li> </ul>                             |
| Lifestyle                 | <ul style="list-style-type: none"> <li>Advocacy of lifestyle changes</li> <li>Diet</li> <li>Exercise</li> <li>Smoking</li> <li>Fats &amp; cholesterol</li> </ul>                                                           |
| Responsibility            | <ul style="list-style-type: none"> <li>Taking tablets mean people don't think they need to change their habits</li> <li>GPs should be addressing lifestyle factors</li> </ul>                                              |
| Side-effects of treatment | <ul style="list-style-type: none"> <li>Muscular pain, weakness, myalgia, arthralgia, sleeping, not sleeping, diabetes, etc.</li> <li>Adverse effects</li> <li>Side-effects</li> <li>Negative impacts of statins</li> </ul> |
| Collateral benefits       | <ul style="list-style-type: none"> <li>Statins improving other conditions eg multiple sclerosis</li> </ul>                                                                                                                 |

1  
2  
3  
4  
5  
6  
7  
8  
9  
10  
11  
12  
13  
14  
15  
16  
17  
18  
19  
20  
21  
22  
23  
24  
25  
26  
27  
28  
29  
30  
31  
32  
33  
34  
35  
36  
37  
38  
39  
40  
41  
42  
43  
44  
45  
46  
47  
48  
49  
50  
51  
52  
53  
54  
55  
56  
57  
58  
59  
60

|                                     |                                                                                                                                                                                                                     |
|-------------------------------------|---------------------------------------------------------------------------------------------------------------------------------------------------------------------------------------------------------------------|
| Evidence/effectiveness of treatment | Statins are in/effective<br>Statins work by<br>The evidence shows<br>Statins halve the incidence of<br>Studies show statin efficacy<br>Effectiveness in primary prevention<br>Effectiveness in secondary prevention |
| Confounding factors                 | It is not the statin, it is...<br>Reducing smoking, not statins, has had an effect...                                                                                                                               |
| Scientific explanation              | Statins operate by tackling reducing the enzymes that encourage production of LD cholesterol...<br>Anti-inflammatory properties of statins...<br>Side-effects are caused by the over-production of...               |
| (Dis)trust                          | Doctors are paid by the number of people they identify/number of prescriptions...<br>Studies are pharmaceutically sponsored...<br>Government is motivated by...<br>NICE has a duty to provide objective guidance... |
| Costs, value                        | Statins only cost 12p per day<br>Prescriptions are increasing as statins come off patent<br>The costs of surgery vs. drugs                                                                                          |
| Personal experience                 | My doctor recommended...<br>I suffered side-effects from...<br>I was on statins for 5 years...<br>We and our patients know that...                                                                                  |

|    |                           |                                                          |
|----|---------------------------|----------------------------------------------------------|
| 1  |                           |                                                          |
| 2  |                           |                                                          |
| 3  |                           | As a doctor...                                           |
| 4  |                           |                                                          |
| 5  |                           | As a patient...                                          |
| 6  |                           |                                                          |
| 7  | Patient/user              | Patients should have a choice                            |
| 8  |                           |                                                          |
| 9  | choice/autonomy           | Patients should check with their doctor                  |
| 10 |                           |                                                          |
| 11 |                           | Statins are not mandatory                                |
| 12 |                           |                                                          |
| 13 |                           | No-one is forced to take a statin                        |
| 14 |                           |                                                          |
| 15 |                           | Patients need to weigh up the pros and cons              |
| 16 |                           |                                                          |
| 17 | Information for decision- | Information for patients                                 |
| 18 |                           |                                                          |
| 19 | making                    | Patients need to make informed decisions                 |
| 20 |                           |                                                          |
| 21 |                           | Patients are confused by the messages they receive       |
| 22 |                           |                                                          |
| 23 |                           | It is important to give clear information                |
| 24 |                           |                                                          |
| 25 | Age, gender               | More men than women/vice versa                           |
| 26 |                           |                                                          |
| 27 |                           | Everyone over 50/65/75/85                                |
| 28 |                           |                                                          |
| 29 |                           | Evidence is lower for those over 75                      |
| 30 |                           |                                                          |
| 31 | Pharmaceutical companies  | Pharma                                                   |
| 32 |                           |                                                          |
| 33 |                           | Sponsorship of trials                                    |
| 34 |                           |                                                          |
| 35 |                           | Sponsorship of individuals                               |
| 36 |                           |                                                          |
| 37 |                           | Influence on individuals, institutions, national bodies, |
| 38 |                           | politics                                                 |
| 39 |                           |                                                          |
| 40 | Reader response           | Where quoted – letters, emails, follow up trails         |
| 41 |                           |                                                          |
| 42 | Trends                    | Over the last ten years...                               |
| 43 |                           |                                                          |
| 44 | International comparisons | The UK is the statins capital of Europe...               |
| 45 |                           |                                                          |
| 46 |                           | UK vs. US/Europe/Australasia                             |
| 47 |                           |                                                          |
| 48 |                           |                                                          |
| 49 |                           |                                                          |
| 50 |                           |                                                          |
| 51 |                           |                                                          |
| 52 |                           |                                                          |
| 53 |                           |                                                          |
| 54 |                           |                                                          |
| 55 |                           |                                                          |
| 56 |                           |                                                          |
| 57 |                           |                                                          |
| 58 |                           |                                                          |
| 59 |                           |                                                          |
| 60 |                           |                                                          |
