# Supplementary material for: A content analysis of the representation of statins in the British newsprint media
Source: PubMed Central journal article supplement — BMJ Open. 2017 Aug 21;7(8):e012613. doi: 10.1136/bmjopen-2016-012613 (PMC5724098; doi:10.1136/bmjopen-2016-012613), 2017-08-21
Supplement: bmjopen-2016-012613supp001.pdf [file bmjopen-2016-012613supp001.pdf]

## DESCRIPTIVE AND ANALYTICAL CODING SCHEME

### General descriptors

- unique article reference number
- date
- publication/outlet
- type of article
  - o news report
  - o report of published/planned study
  - o personal interest story
  - o comment
  - o dear doctor column/Q&A
  - o other (specify)
- headline (write in full)
- sub-headline (write in full)
- reference to statins
  - o main subject
  - o secondary subject (eg. in article on heart disease or lifestyle measures)
  - o passing comment
- pictures/images – brief description eg. older woman in hospital bed wearing gown & taking blue tablets from a cup; red tablets scattered on a blue background
- author

- name
- title (eg. Chief health correspondent; doctor; 'celebrity' columnist)
- contributors/sources quoted
  - name
  - organisation/designation (eg. British Heart Foundation; King's College London; NICE; BMJ editor; lay commentator)
    - medical 'experts'
    - study authors
    - lay/public individuals or bodies
    - charities/support groups
- treatment of statins overall
  - positive
  - negative
  - neutral
  - not categorisable
- examples of positive/negative language
  - mention of harms, risks, side-effects
  - mention of benefits, positive collateral impact
    - eg. 'few argue over effectiveness of statins for secondary prevention'; 'statins help reduce signs of dementia by almost a third'
    - 'significant risk of side-effects'; 'never prescribe a statin for a loved one'
- apparent purpose of the article
  - eg. reporting publication of new guidance
  - responding to publication of a new study

- reporting patient experience
- responding to reader letter
- reporting prominent medical debate in the BMJ/Lancet

### **Constructed themes and suggested indicators**

| <b>Theme</b>              | <b>Example constructs</b>                                                                                                                              |
|---------------------------|--------------------------------------------------------------------------------------------------------------------------------------------------------|
| Medicalisation            | Medicalising the healthy population<br>Over-medication<br>Over-treatment<br>Giving tablets instead of modifying lifestyles                             |
| Lifestyle                 | Advocacy of lifestyle changes<br>Diet<br>Exercise<br>Smoking<br>Fats & cholesterol                                                                     |
| Responsibility            | Taking tablets mean people don't think they need to change their habits<br>GPs should be addressing lifestyle factors                                  |
| Side-effects of treatment | Muscular pain, weakness, myalgia, arthralgia, sleeping, not sleeping, diabetes, etc.<br>Adverse effects<br>Side-effects<br>Negative impacts of statins |
| Collateral benefits       | Statins improving other conditions eg multiple sclerosis                                                                                               |

|                                     |                                                                                                                                                                                                                                                    |
|-------------------------------------|----------------------------------------------------------------------------------------------------------------------------------------------------------------------------------------------------------------------------------------------------|
| Evidence/effectiveness of treatment | <p>Statins are in/effective</p> <p>Statins work by</p> <p>The evidence shows</p> <p>Statins halve the incidence of</p> <p>Studies show statin efficacy</p> <p>Effectiveness in primary prevention</p> <p>Effectiveness in secondary prevention</p> |
| Confounding factors                 | <p>It is not the statin, it is...</p> <p>Reducing smoking, not statins, has had an effect...</p>                                                                                                                                                   |
| Scientific explanation              | <p>Statins operate by tackling reducing the enzymes that encourage production of LD cholesterol...</p> <p>Anti-inflammatory properties of statins...</p> <p>Side-effects are caused by the over-production of...</p>                               |
| (Dis)trust                          | <p>Doctors are paid by the number of people they identify/number of prescriptions...</p> <p>Studies are pharmaceutically sponsored...</p> <p>Government is motivated by...</p> <p>NICE has a duty to provide objective guidance...</p>             |
| Costs, value                        | <p>Statins only cost 12p per day</p> <p>Prescriptions are increasing as statins come off patent</p> <p>The costs of surgery vs. drugs</p>                                                                                                          |
| Personal experience                 | <p>My doctor recommended...</p> <p>I suffered side-effects from...</p> <p>I was on statins for 5 years...</p> <p>We and our patients know that...</p>                                                                                              |

|                           |                                                                      |
|---------------------------|----------------------------------------------------------------------|
|                           | As a doctor...                                                       |
|                           | As a patient...                                                      |
| Patient/user              | Patients should have a choice                                        |
| choice/autonomy           | Patients should check with their doctor                              |
|                           | Statins are not mandatory                                            |
|                           | No-one is forced to take a statin                                    |
|                           | Patients need to weigh up the pros and cons                          |
| Information for decision- | Information for patients                                             |
| making                    | Patients need to make informed decisions                             |
|                           | Patients are confused by the messages they receive                   |
|                           | It is important to give clear information                            |
| Age, gender               | More men than women/vice versa                                       |
|                           | Everyone over 50/65/75/85                                            |
|                           | Evidence is lower for those over 75                                  |
| Pharmaceutical companies  | Pharma                                                               |
|                           | Sponsorship of trials                                                |
|                           | Sponsorship of individuals                                           |
|                           | Influence on individuals, institutions, national bodies,<br>politics |
| Reader response           | Where quoted – letters, emails, follow up trails                     |
| Trends                    | Over the last ten years...                                           |
| International comparisons | The UK is the statins capital of Europe...                           |
|                           | UK vs. US/Europe/Australasia                                         |
